# Supplementary material for: Peptidomimetic organocatalysts: efficient Michael addition of ketones onto nitroolefins with very low catalyst loading
Source: Royal Society of Chemistry journal article supplement (doi:10.1039/c4ra04165h), 2014-01-01
Supplement: c4ra04165h1.pdf [file c4ra04165h1.pdf]

## SUPPORTING INFORMATION

### Peptidomimetic Organocatalysts: Efficient Michael Addition of Ketones onto Nitroolefins with Very Low Catalyst Loading

Srivari Chandrasekhar<sup>\*a</sup>, Chintakunta Praveen Kumar<sup>a</sup>, Togapur Pavan Kumar<sup>a</sup>, Kothapalli Haribabu<sup>a</sup>, Bharatam Jagadeesh<sup>\*b</sup>, Jerripothula K Lakshmi<sup>b</sup> and Prathama S Mainkar<sup>\*a</sup>

<sup>a</sup> Division of Natural Products Chemistry, CSIR-Indian Institute of Chemical Technology, Uppal Road, Tarnaka, Hyderabad, 500007, India. E-mail: srivari@iict.res.in; Fax: +91-40-27160512.

<sup>b</sup> Centre for NMR and Structural chemistry, CSIR-Indian Institute of Chemical Technology, Uppal Road, Tarnaka, Hyderabad, 500007, India. E-mail: bj@iict.res.in; Fax: +91-40-27160512.

| Sl No. | Table of Contents                                                       | Page No. |
|--------|-------------------------------------------------------------------------|----------|
| 1      | General information                                                     | S2       |
| 2      | Materials                                                               | S2       |
| 3      | Experimental procedures, analytical and spectroscopic data              |          |
|        | 3.1. Preparation of compounds <b>2</b> and <b>2a</b>                    | S2-S3    |
|        | 3.2. Synthetic procedure of 1,5-substituted triazole catalyst <b>7</b>  | S3-S5    |
|        | 3.3. Synthetic procedure of 1,4-substituted triazole catalyst <b>7a</b> | S5-S7    |
| 4      | Reaction scope                                                          |          |
|        | 4.1. General procedure for asymmetric Michael addition reaction         | S7       |
|        | 4.2. General procedure for racemic Michael addition reaction            | S7       |
|        | 4.3. Analytical data of compounds <b>10a-10n</b>                        | S7-S11   |
| 5      | <sup>1</sup> H and <sup>13</sup> C Spectrums of compounds               | S12-S21  |
| 6      | HPLC chromatograms of the compounds <b>10a-10n</b>                      | S22-S35  |
| 7      | NMR experiments                                                         | S36-S39  |
| 8      | DFT studies                                                             | S39-S48  |

## 1. General information

Melting points were recorded after column chromatography of compound on Polmon Melting point apparatus and were uncorrected. <sup>1</sup>H NMR (300 MHz or 500 MHz) and <sup>13</sup>C NMR (75 MHz or 125 MHz) spectra were recorded in CDCl<sub>3</sub>, CD<sub>3</sub>COCD<sub>3</sub> and D<sub>2</sub>O solvents on Bruker Avance 300 or INOVA 500 MHz spectrometer at ambient temperature. The chemical shifts are reported in ppm relative to CDCl<sub>3</sub> ( $\delta$  = 7.26), to DMSO ( $\delta$  = 2.50) and to D<sub>2</sub>O ( $\delta$  = 4.79) for <sup>1</sup>H NMR and relative to the central resonances of CDCl<sub>3</sub> ( $\delta$  = 77.0) and to DMSO ( $\delta$  = 39.5) for <sup>13</sup>C NMR. HRMS of the compounds were recorded on high resolution QSTAR XL hybrid MS/MS system, applied bio systems under electron spray ionization method conditions preparing samples in methanol. The optical rotations were recorded on ANTON PAAR MCP-200 digital polarimeter. IR spectra were recorded on Perkin-Elmer Infrared spectrometer and samples were scanned either in neat KBr wafers or in chloroform as a thin film. Routine monitoring of reaction was performed by TLC, using precoated silica gel TLC plates obtained from E-Merck. IUPAC names of catalysts and Michael products were taken from Chem. ultra 12. All the column chromatographic separations were done by using silica gel (Acme's, 60-120 mesh). Evaporation of solvents was performed at reduced pressure. Analytical high performance liquid chromatography (HPLC) was performed using Daicel Chiralpak IA and IC columns.

## 2. Materials

All reactions were performed under an atmosphere of nitrogen or argon in flame-dried or oven-dried glassware with magnetic stirring. All solvents were dried prior to use. For HPLC commercially available HPLC grade isopropanol and hexane were used. Nitroolefines were prepared following the known procedure in the literature<sup>1</sup>.

## 3. Experimental procedures, analytical and spectroscopic data

### 3.1 Preparation procedure of compounds 2 and 2a

**(S)-Ethyl 1-((1-(*tert*-butoxycarbonyl)pyrrolidin-2-yl)methyl)-1*H*-1,2,3-triazole-5-carboxylate (2) and (S)-ethyl 1-((1-(*tert*-butoxycarbonyl)pyrrolidin-2-yl)methyl)-1*H*-1,2,3-triazole-4-carboxylate (2a):**

Triazole catalysts **7** and **7a** were synthesized from Boc-protected proline azide.<sup>2</sup>

1. For aromatic nitroalkenes J. Bourguignon, G. Le Nard, G. Queguiner, *Can. J. Chem.*, 1985, **63**, 2354-2361;

2. For synthesis of Proline azide from *L*-proline a) A. Paul, H. Bittermann and P. Gmeiner, *Tetrahedron*, 2006, **62**,8919-8927. b) A. Esther, C. Xacobe, Cambeiro, J. Ciril and M. A. Perica's, *Org.Lett.*, 2007, **9**, 3717-3720. To a solution of **1** (3.5 g, 15.4 mmol) in toluene (60 mL) was added ethyl propiolate (4.5 g, 46.4 mmol). The mixture was heated to reflux for 19 h, after cooling to room temperature, the solvent was removed and the two isomers were separated by silica gel column chromatography, furnishing 3.31 g (66%) of **2a** and 1.25 g (25%) of **2** as waxy solid and viscous oil respectively yield 91%.

### Ru-catalyzed click reaction

To the azide **1** (4.0 g, 17.6 mmol) and ethyl propiolate (5.2 g, 53.0 mmol) in dry benzene (30 mL) was added catalytic amount<sup>3a</sup> (0.281 g, 2 mol %) of Cp\*RuCl(PPh<sub>3</sub>)<sub>2</sub> in argon atmosphere and resulting mixture was stirred at 80 °C. After completion of the starting materials, mixture was filtered, solvent was removed *in vacuo* and residue was purified on silica gel column chromatography to yield triazole **2** (4.0 g, 70%).

### Cu- catalyzed click reaction

Compound **1** (4.0 g, 17.6 mmol) upon Cu-catalysed [3+2] cycloaddition reaction<sup>3b</sup> with ethyl propiolate (5.2 g, 53.0 mmol) gave **2a** as white solid (4.87g, 85 % yield). Analytical data of **2** and **2a** matched with the data reported in literature.<sup>3b</sup>

### 3.2 Synthetic procedure of 1,5-substituted triazole catalyst **7**

#### (*S*)-*tert*-Butyl-2-((5-(((*S*)-1-amino-4-(benzyloxy)-1,4-dioxobutan-2-yl)carbamoyl)-1*H*-1,2,3-triazol-1-yl)methyl)pyrrolidine-1-carboxylate (**5**)

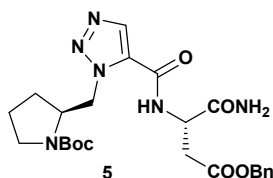

Ester hydrolysis of **2** (3.0 g, 9.2 mmol) carried out using LiOH.H<sub>2</sub>O (1.1 g, 27 mmol) in 7:3 ratio of THF: H<sub>2</sub>O (20 mL) gave acid **3** (2.19 g, 80% crude), which was used as such for the next step. To the acid **3** (2.0 g, 6.17 mmol) in dry CH<sub>2</sub>Cl<sub>2</sub> (15 mL) was added HOBt (0.91 g, 6.79 mmol) and stirred for 10 min. EDCI (1.29 g, 6.79 mmol) was added to the reaction mixture at 0 °C and allowed to stir for another 10 min. Then was added amine **4**<sup>4</sup> (1.37 g, 6.17 mmol) (pre basified with DIPEA, (2.68 mL, 15.43 mmol)) and the resultant mixture was allowed to stir at ambient temperature for 24 h. After consumption of the starting materials reaction was quenched with saturated aqueous NH<sub>4</sub>Cl and extracted with CH<sub>2</sub>Cl<sub>2</sub>. Organic layer was sequentially washed with saturated aqueous NaHCO<sub>3</sub>, brine solution, dried over anhydrous Na<sub>2</sub>SO<sub>4</sub>, concentrated *in vacuo* and residue was purified by silica gel column chromatography to yield **5** as a white solid.

Yield 80% (3.6 g); mp 80-82 °C; [ $\alpha$ ]<sub>D</sub><sup>25</sup> = -4.8 (*c* 1, MeOH); IR ( $\nu_{\max}$ ): 3402, 2973, 2926, 1733, 1681, 1570, 1396, 1170, 771 cm<sup>-1</sup>; <sup>1</sup>H NMR (300 MHz, DMSO-*d*<sub>6</sub>)  $\delta$ : 8.16 (d, *J* = 7.6 Hz, 1H), 7.37 (rotamer, 1H), 6.64 (s, 1H), 6.54-6.39 (rotamer, 6H), 4.26 (s, 2H), 4.04-3.76 (rotamer, 3H),

3.49-3.34 (rotamer, 1H), 2.43-2.25 (rotamer, 2H), 2.18-2.06 (rotamer, 1H), 1.95-1.81 (rotamer, 1H), 1.05-0.64 (rotamer, 4H), 0.52-0.43 (rotamer, 9H).  $^{13}\text{C}$  NMR (75 MHz, DMSO- $d_6$ )  $\delta$ : 171.0, 169.7, 157.0, 153.0, 135.6, 133.9, 130.5, 127.9, 127.4, 127.5, 78.2, 65.3, 56.2, 55.4, 50.6, 48.9, 45.4, 35.6, 27.5, 22.5, 21.6; HRMS (ESI):  $m/z$  calculated for  $[\text{C}_{24}\text{H}_{33}\text{O}_6\text{N}_6]$  501.2456  $[\text{M}+\text{H}]^+$ , found 523.2457.

3. a) For Ruthenium catalysed azide alkyne cycloaddition reactions (RuAAC) see: L. Zhang, X. Chen, P. Xue, H. H. Y. Sun, I. D. Williams, K. B. Sharpless, V. V. Fokin, G. Jia, *J. Am. Chem. Soc.* **2005**, *127*, 15998-15999; b) For the synthetic procedure and Characterisation data of compound **2a** see: A. Paul, H. Bittermann, P. Gmeiner, *Tetrahedron* **62**, **2006**, 8919-8927;

4. For synthesis of  $\beta$ -Benzyl *L*-Isoasparaginate see: J. Eldo, J. P. Cardia, E. M. O'Day, J. Xia, H. Tsuruta, E. R. Kantrowitz, *J. Med. Chem.* **2006**, *49*, 5932-5938.

**(S)-4-Amino-3-(1-(((S)-1-(tert-butoxycarbonyl)pyrrolidin-2-yl)methyl)-1H-1,2,3-triazole-5-carboxamido)-4-oxobutanoic acid (6)**

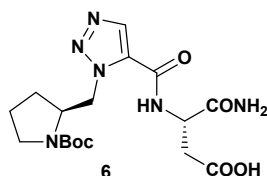

To compound **5** (2.5 g, 5.0 mmol) in methanol (6 mL) was added 10% Pd/C (53 mg 0.5 mmol) under inert atmosphere. This was allowed to react under  $\text{H}_2$  atmosphere for about 5-6 h. After completion of the reaction, the mixture was filtered through a pad of celite bed using methanol, concentrated *in vacuo*, resultant solid was purified through silica gel column chromatography ( $\text{CHCl}_3$ : MeOH; 9:1) to get **6** as fine white colored solid.

Yield 95% (1.94 g); mp 98-101  $^\circ\text{C}$ ;  $[\alpha]_{\text{D}}^{25} = -11.7$  ( $c$  1, MeOH); IR ( $\nu_{\text{max}}$ ): 3181, 2967, 2928, 1691, 1569, 1396, 772  $\text{cm}^{-1}$ ;  $^1\text{H}$  NMR (300 MHz, DMSO- $d_6$ )  $\delta$ : 8.12 (rotamer, 1H), 7.39 (rotamer d, 1H), 6.59 (s, 1H), 6.35 (s, 1H), 4.00-3.78 (rotamer, 3H), 3.50-3.35 (rotamer, 1H), 2.40-2.22 (rotamer, 2H), 2.04-1.89 (rotamer, 1H), 1.84-1.63 (rotamer, 1H), 1.05-0.64 (rotamer, 4H), 0.60-0.40 (rotamer, 9H).  $^{13}\text{C}$  NMR (75 MHz, DMSO- $d_6$ )  $\delta$ : 171.6, 157.3, 153.3, 134.1, 130.9, 78.5, 56.4, 55.7, 50.9, 49.4, 45.6, 35.8, 27.8, 22.7, 21.8 HRMS (ESI):  $m/z$  calculated for  $[\text{C}_{17}\text{H}_{26}\text{O}_6\text{N}_6\text{Na}]$  433.1806  $[\text{M}+\text{Na}]^+$ , found 433.1800.

**(S)-4-Amino-4-oxo-3-(1-((S)-pyrrolidin-2-ylmethyl)-1H-1,2,3-triazole-5-carboxamido)butanoic acid (7)**

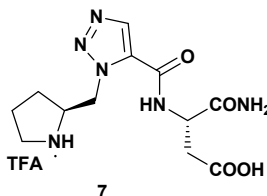

To a suspension of compound **6** (1.50 g, 3.6 mmol) in  $\text{CH}_2\text{Cl}_2$  (5 mL) was added trifluoroacetic acid (5 mL) ( $\text{CH}_2\text{Cl}_2$ : TFA; 1:1) at 0  $^\circ\text{C}$  and stirred at room temperature. Reaction was monitored by thin layer chromatography. After completion of the reaction,  $\text{CH}_2\text{Cl}_2$  was removed *in vacuo*. Excess



trifluoroacetic acid was co-distilled with 5 mL of CH<sub>2</sub>Cl<sub>2</sub>, this process was repeated several times and residue was finally washed with *n*-pentane, dried under vacuum to get compound **7** as white solid.

Yield 88% (0.99 g); mp 80-82 °C; [ $\alpha$ ]<sub>D</sub><sup>25</sup> = +9.0 (*c* 1, CH<sub>3</sub>OH); IR ( $\nu_{\max}$ ): 3415, 1672, 1561, 1200, 1137 cm<sup>-1</sup>; <sup>1</sup>H NMR (300 MHz, D<sub>2</sub>O)  $\delta$ : 8.22 (d, *J* = 8.3 Hz, 1H), 5.09 (dd, *J* = 14.9, 3.6 Hz, 1H), -4.91 (m, 1H), 4.19-4.04 (m, 1H), 3.46-3.24 (m, 2H), 2.90-2.55 (m, 2H), 2.39-2.24 (m, 1H), 2.24-1.77 (m, 4H); <sup>13</sup>C NMR (75 MHz, D<sub>2</sub>O)  $\delta$ : 175.9, 174.7, 158.3, 134.1, 130.4, 58.9, 50.7, 49.2, 45.1, 37.2, 26.7, 21.9; HRMS (ESI): *m/z* calculated for [C<sub>12</sub>H<sub>19</sub>O<sub>4</sub>N<sub>6</sub>] 311.1462 [M + H]<sup>+</sup>, found 311.1460.

### 3.3 Synthetic procedure of 1,4-substituted triazole catalyst **7a**

#### (*S*)-*tert*-Butyl-2-((4-(((*S*)-1-amino-4-(benzyloxy)-1,4-dioxobutan-2-yl)carbamoyl)-1*H*-1,2,3-triazol-1-yl)methyl)pyrrolidine-1-carboxylate (**5a**)

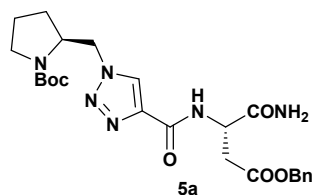

Compound **2a** (4.0 g, 12.3 mmol) was treated with LiOH.H<sub>2</sub>O (1.59 g, 37 mmol) in 30 mL of THF:H<sub>2</sub>O (7:3). After completion of the reaction THF was removed in *vacuo* and diluted with 50 mL of water. To this aqueous layer, 5 mL of ethyl acetate was added and layers separated to remove impurities, aqueous layer was acidified (p<sup>H</sup> = 2-3) with solid KHSO<sub>4</sub>, extracted with ethyl acetate, organic layer was dried over anhydrous Na<sub>2</sub>SO<sub>4</sub> and concentrated to obtain (2.99 g, 82% crude) a fine white colored solid **3a**. To this acid (2.93 g, 9.89 mmol) in dry CH<sub>2</sub>Cl<sub>2</sub> (20 mL) was added HOBt (1.46 g, 10.88 mmol) at room temperature and stirred for 10 min under nitrogen gas. Then, to the reaction mixture was added EDCI (2.07 g, 10.88 mmol) at 0 °C, allowed to stir at ice cold temperature for another 10 min. To this,  $\beta$ -benzyl *L*-isoasparaginate (**4**) (2.19 g, 9.89 mmol) (Pre basified with DIPEA; 3.83 g, 29.69 mmol) was added and stirred for 24 h. Reaction was monitored by TLC, after total consumption of the starting materials, reaction was quenched with super saturated aqueous NH<sub>4</sub>Cl and extracted with CH<sub>2</sub>Cl<sub>2</sub>. Organic layer was given washings with saturated aqueous NaHCO<sub>3</sub> and brine solutions, dried over anhydrous Na<sub>2</sub>SO<sub>4</sub>, concentrated in *vacuo* and the residue was purified by column chromatography using hexane and EtOAc (2:8) to obtain **5a** as a white solid.

Yield 85% (4.19 g); mp 70-73 °C; [ $\alpha$ ]<sub>D</sub><sup>25</sup> = -25.8 (*c* 1, MeOH); IR ( $\nu_{\max}$ ): 3348, 2976, 2885, 1733, 1683, 1569, 1396, 1170, 771 cm<sup>-1</sup>; <sup>1</sup>H NMR (300 MHz, CDCl<sub>3</sub>)  $\delta$ : 8.21 (d, *J* = 7.6 Hz, 1H), 8.06 (s, 1H), 7.40-7.29 (m, 5H), 6.62 (s, 1H), 5.84 (s, 1H), 5.16 (s, 2H), 5.11-5.03 (m, 1H), 4.76-4.36 (m, 2H), 4.19-4.08 (br, 1H), 3.48-3.21 (m, 2H), 3.22 (dd, *J* = 17.4, 4.5 Hz, 1H), 2.88 (dd, *J* = 16.6, 6.0 Hz, 1H), 2.12-1.66 (m, 4H), 1.49 (s, 9H); <sup>13</sup>C NMR (75 MHz, CDCl<sub>3</sub>+ DMSO-*d*<sub>6</sub>)  $\delta$ : 171.6, 170.1, 159.2, 141.9, 134.8, 127.7, 127.3, 125.9, 79.4, 65.8, 56.2, 52.6, 51.1, 48.3, 46.2, 46.0, 35.6, 27.7, 22.6, 21.9; HRMS (ESI): *m/z* calculated for [C<sub>24</sub>H<sub>33</sub>O<sub>6</sub>N<sub>6</sub>] 501.2456 [M+H]<sup>+</sup>, found 501.2455.

**(S)-4-Amino-3-(1-(((S)-1-(tert-butoxycarbonyl)pyrrolidin-2-yl)methyl)-1H-1,2,3-triazole-4-carboxamido)-4-oxobutanoic acid (6a)**

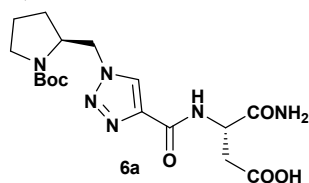

To **5a** (2.0 g, 4.0 mmol) in methanol (8 mL) was added 10% Pd/C (42 mg 0.4 mmol) under nitrogen atmosphere and was reacted under hydrogen atmosphere for about 4-5 h. After consumption of the starting material, mixture was filtered through a short bed of celite using methanol, solvent was removed on rotary evaporator to attain the solid which was column purified to obtain **6a** as white coloured solid.

Yield 96% (1.58 g); mp 85-87 °C;  $[\alpha]_{\text{D}}^{25} = -28.3$  (*c* 1, MeOH); IR ( $\nu_{\text{max}}$ ): 3701, 3082, 2908, 1676, 1586, 773  $\text{cm}^{-1}$ ;  $^1\text{H}$  NMR (300 MHz,  $\text{D}_2\text{O}$ )  $\delta$ : 8.44 (s, 1H), 4.99-4.89 (rotamer, 1H), 4.70-4.55 (rotamer, 1H), 4.37-4.30 (rotamer, 2H), 3.45-3.27 (rotamer, 2H), 3.45-3.28 (rotamer, 2H), 3.09-2.88 (rotamer, 2H), 2.12-1.78 (rotamer, 4H), 1.41- 1.07 (rotamer, 9H);  $^{13}\text{C}$  NMR (75 MHz,  $\text{CDCl}_3 + \text{DMSO-d}_6$ )  $\delta$ : 171.5, 158.6, 153.2, 141.2, 125.6, 78.6, 55.6, 51.4, 50.5, 47.9, 45.6, 35.1, 27.1, 21.9, 21.2; HRMS (ESI): *m/z* calculated for  $[\text{C}_{17}\text{H}_{27}\text{O}_6\text{N}_6]$  411.1986  $[\text{M}+\text{H}]^+$ , found 411.1982.

**(S)-4-Amino-4-oxo-3-(1-((S)-pyrrolidin-2-ylmethyl)-1H-1,2,3-triazole-4-carboxamido) butanoic acid (7a)**

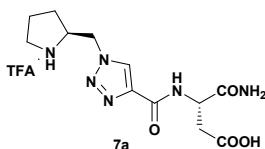

To a suspension of **6a** (1.50 g, 3.6 mmol) in  $\text{CH}_2\text{Cl}_2$  (5 mL) was added trifluoroacetic acid (5 mL)  $\text{CH}_2\text{Cl}_2$ : TFA (1:1) at 0 °C and stirred at room temperature. Reaction was monitored by thin layer chromatography. After completion of the reaction dichloromethane was removed *in vacuo*. Excess trifluoroacetic acid was co-distilled with 5 mL of  $\text{CH}_2\text{Cl}_2$ , this process was repeated several times, and residue was finally washed with *n*-pentane and dried under vacuum to get compound **7a** as solid.

Yield 88% (1.0 g); mp 179-181 °C;  $[\alpha]_{\text{D}}^{25} = +28.8$  (*c* 1, MeOH); IR ( $\nu_{\text{max}}$ ): 3391, 1676, 1571, 1200, 1134  $\text{cm}^{-1}$ ;  $^1\text{H}$  NMR (300 MHz,  $\text{D}_2\text{O}$ )  $\delta$ : 8.52 (s, 1H), 4.94-4.87 (m, 2H), 4.20-4.04 (m, 1H), 3.49-3.27 (m, 2H), 3.11-2.88 (m, 2H), 2.31-2.12 (m, 1H), 2.21-1.76 (m, 4H);  $^{13}\text{C}$  NMR (75 MHz,  $\text{D}_2\text{O}$ )  $\delta$ : 174.1, 173.9, 160.7, 140.7, 126.9, 58.4, 49.5, 49.1, 45.0, 35.2, 26.6, 21.8 HRMS (ESI): *m/z* calculated for  $[\text{C}_{12}\text{H}_{19}\text{O}_4\text{N}_6]$  311.1462  $[\text{M}+\text{H}]^+$ , found 311.1460.

## 4. Substrate scope

### 4.1. General procedure for Michael addition reaction with 0.5 mol % catalyst loading

To the catalyst **7** (0.005 equiv/ 0.5 mol %) or **7a** (0.005 equiv/ 0.5 mol %) (10 mg of Catalyst was dissolved in 2 mL of methanol and from this required quantity of catalyst was taken) in MeOH (0.3

mL) was added ketone (5.0 equiv) followed by nitro olefin (1.0 equiv) at room temperature. Reaction was typically monitored by TLC, after completion of the reaction compound was directly adsorbed on silica gel and product was isolated using EtOAc and hexane.

#### 4.2. General procedure for racemic Michael addition reaction with *DL*-Proline

To *DL*-Proline (0.3 equiv, 30 mol %) in MeOH (0.3 mL) was sequentially added ketone (5.0 equiv) and nitro olefin (1.0 equiv) at room temperature. After completion of the reaction crude material was column purified on silica gel using hexane and EtOAc.

#### 4.3. Analytical data of the compounds 10a-10n

##### (*S*)- 2-((*R*)-2-Nitro-1-(3-nitrophenyl)ethyl)cyclohexanone (10a)<sup>5</sup>

Reaction was performed with 30 mg (0.15 mmol) of nitroolefin **9a**, 80  $\mu$ L (0.78 mmol) of cyclohexanone and 40  $\mu$ L of catalyst solution **7** or **7a** following the general procedure.

White solid; <sup>1</sup>H NMR (300 MHz, CDCl<sub>3</sub>)  $\delta$  8.16-8.09 (m, 2H), 7.60-7.50 (m, 2H), 5.02 (dd, *J* = 13.0, 4.4, Hz, 1H), 4.71 (dd, *J* = 12.9, 10.1 Hz, 1H), 3.96 (dt, *J* = 9.8, 4.4 Hz, 1H), 2.78-2.70 (m, 1H), 2.55-2.36 (m, 2H), 2.17-2.13 (m, 1H), 1.87-1.58 (m, 4H), 1.36-1.16 (m, 1H).

HPLC: chiral pak-IA column, 210 nm, isopropanol/hexane = 8:92, 1.0 mL/min; with catalyst **7** Rt = 23.81 (major), 20.65 (minor), 94:6 *er*, *syn/anti* = 96:4; Yield: 52% (23 mg); [ $\alpha$ ]<sub>D</sub><sup>25</sup> = -18.04 (*c* 2.6, CHCl<sub>3</sub>); with catalyst **7a** Rt = 23.46 (major), 20.47 (minor), 94:6 *er*, *syn/anti* = 95:5; Yield: 50% (22 mg); [ $\alpha$ ]<sub>D</sub><sup>25</sup> = -16.08 (*c* 2.8, CHCl<sub>3</sub>).

##### (*S*)- 2-((*S*)-1-(3-Methylthiophen-2-yl)-2-nitroethyl)cyclohexanone (10b)

Reaction was performed with 30 mg (0.21 mmol) of nitroolefin **9b**, 112  $\mu$ L (1.0 mmol) of cyclohexanone and 66  $\mu$ L of catalyst solution **7** or **7a** following the general procedure.

Solid; m.p 87-89 °C; IR ( $\nu_{\max}$ ) : 2932, 1707, 1552, 1378, 1128, 756, 716 cm<sup>-1</sup>; <sup>1</sup>H NMR (500 MHz, CDCl<sub>3</sub>)  $\delta$ : 7.14 (d, *J* = 5.0 Hz, 1H), 6.75 (d, *J* = 5.0 Hz, 1H), 4.98 (dd, *J* = 12.5, 4.1 Hz, 1H), 4.49 (dd, *J* = 12.6, 10.3 Hz, 1H), 4.18 (td, *J* = 3.8, 9.8, 14.4 Hz, 1H), 2.62-2.55 (m, 1H), 2.50-2.44 (m, 1H), 2.42-2.34 (m, 1H), 2.18 (s, 3H), 2.15-2.08 (m, 1H), 1.88-1.78 (m, 2H), 1.74-1.55 (m, 2H), 1.31-1.22 (m, 1H); <sup>13</sup>C NMR (125 MHz, CDCl<sub>3</sub>)  $\delta$ : 211.6, 136.5, 134.4, 130.0, 123.2, 79.5, 54.0, 42.7, 37.3, 32.9, 28.6, 25.1, 13.8; HRMS (ESI): *m/z* calculated for [C<sub>13</sub>H<sub>17</sub>NNa O<sub>3</sub>S] 290.0821[M+Na]<sup>+</sup>, found 290.0826.

HPLC: chiral pak-IA column, 210 nm, isopropanol/hexane = 5:95, 1.0 mL/min, with catalyst **7** Rt = 16.42 (major), 18.93 (minor), 93:7 *er*, *syn/anti* = 90:10; Yield: 72% (41 mg); [ $\alpha$ ]<sub>D</sub><sup>25</sup> = -28.0 (*c* 1, CHCl<sub>3</sub>); with catalyst **7a** Rt = 15.44 (major), 17.91 (minor), 89:11 *er*, *syn/anti* = 88:12; Yield: 69% (39 mg); [ $\alpha$ ]<sub>D</sub><sup>25</sup> = -30.0 (*c* 1, CHCl<sub>3</sub>).

##### (*S*)-2-((*R*)-1-(3-(Benzyloxy)phenyl)-2-nitroethyl)cyclohexanone (10c)

Reaction was performed with 30 mg (0.11 mmol) of nitroolefin **9c**, 60  $\mu$ L (0.58 mmol) of cyclohexanone and 36  $\mu$ L catalyst solution **7** or **7a** following the general procedure.

Solid; m.p 126-128 °C; IR ( $\nu_{\max}$ ) : 2935, 2360, 1706, 1507, 825  $\text{cm}^{-1}$ ;  $^1\text{H}$  NMR (500 MHz,  $\text{CDCl}_3$ )  $\delta$ : 7.45-7.31 (m, 6H), 7.25-7.21 (m, 1H), 6.89-6.85 (m, 1H), 6.78-6.75 (m, 1H), 5.03 (s, 2H), 4.91 (dd,  $J = 12.5, 4.4$  Hz, 1H), 4.60 (dd,  $J = 12.6, 10.0$  Hz, 1H), 3.72 (td,  $J = 4.4, 9.9, 14.3$  Hz, 1H), 2.66-2.59 (m, 1H), 2.49-2.43 (m, 1H), 2.40-2.32 (m, 1H), 2.11-2.04 (m, 1H), 1.80-1.48 (m, 4H), 1.23-1.16 (m, 1H);  $^{13}\text{C}$  NMR (125 MHz,  $\text{CDCl}_3$ )  $\delta$ : 211.8, 158.9, 139.3, 136.6, 129.9, 128.5, 127.9, 127.5, 120.6, 115.2, 113.6, 78.7, 70.0, 52.4, 43.8, 42.7, 33.1, 29.6, 28.4, 25.0; HRMS (ESI):  $m/z$  calculated for  $[\text{C}_{21}\text{H}_{23}\text{NNaO}_4]$  376.1519  $[\text{M}+\text{Na}]^+$ , found 376.1542.

HPLC: chiral pak-IA column, 210 nm, isopropanol/hexane = 5:95, 1.0 mL/min, with catalyst **7** Rt = 21.85 (major), 17.29 (minor), 87:13 *er, syn/anti* = 97:3; Yield: 72% (29 mg);  $[\alpha]_{\text{D}}^{25} = -24.0$  (*c* 1,  $\text{CHCl}_3$ ); with catalyst **7a** Rt = 21.84 (major), 17.26 (minor), 84:16 *er, syn/anti* = 93:7; Yield: 68% (28 mg);  $[\alpha]_{\text{D}}^{25} = -13.0$  (*c* 1,  $\text{CHCl}_3$ ).

#### **(S)-2-((S)-1-(Furan-2-yl)-2-nitroethyl)cyclohexanone (10d)**<sup>5</sup>

Reaction was performed with 30 mg (0.21 mmol) of nitroolefin **9d**, 110  $\mu\text{L}$  (1.0 mmol) of cyclohexanone and 66  $\mu\text{L}$  of catalyst solution **7** or **7a** following the general procedure. Yellow liquid;  $^1\text{H}$  NMR (300 MHz,  $\text{CDCl}_3$ )  $\delta$ :  $^1\text{H}$  NMR ( $\text{CDCl}_3$ , 400 MHz):  $\delta$  7.37 (s, 1H), 6.30-6.27 (m, 1H), 6.18 (d,  $J = 3.2$  Hz, 1H), 4.83-4.75 (m, 1H), 4.70-4.63 (m, 1H), 4.01-3.93 (m, 1H), 2.80-2.71 (m, 1H), 2.50-2.32 (m, 2H), 2.15-2.08 (m, 1H), 1.87-1.56 (m, 3H), 1.32-1.24 (m, 1H).

HPLC: chiral pak-IA column, 210 nm, isopropanol/hexane = 7:93, 1.0 mL/min, with catalyst **7** Rt = 11.45 (major), 14.42 (minor), 79:21 *er, syn/anti* = 97:3; Yield: 68% (34 mg);  $[\alpha]_{\text{D}}^{25} = -4.31$  (*c* 0.85,  $\text{CHCl}_3$ ); with catalyst **7a** Rt = 11.56 (major), 14.48 (minor), 75:25 *er, syn/anti* = 94:6; Yield: 65% (33 mg);  $[\alpha]_{\text{D}}^{25} = -4.00$  (*c* 0.8,  $\text{CHCl}_3$ ).

#### **(S)-2-((R)-2-Nitro-1-(p-tolyl)ethyl)cyclohexanone (10e)**<sup>5</sup>

Reaction was performed with 30 mg (0.18 mmol) of nitroolefin **9e**, 90  $\mu\text{L}$  (0.92 mmol) of cyclohexanone and 57  $\mu\text{L}$  catalyst solution **7** or **7a** following the general procedure.

$^1\text{H}$  NMR (300 MHz,  $\text{CDCl}_3$ )  $\delta$ : 7.12 (d,  $J = 7.5$  Hz, 2H), 7.04 (d,  $J = 8.3$  Hz, 2H), 4.91 (dd,  $J = 12.0, 4.5$  Hz, 1H), 4.60 (dd,  $J = 12.0, 9.8$  Hz, 1H), 3.72 (dt,  $J = 9.8, 4.5$  Hz, 1H), 2.66 (dt,  $J = 11.3, 5.2$  Hz, 1H), 2.52-2.34 (m, 1H), 2.31 (s, 3H), 2.13-2.02 (m, 1H), 1.82-1.50 (m, 1H), 1.31-1.15 (m, 1H).

HPLC: chiral pak-IA column, 210 nm, isopropanol/hexane = 5:95, 1.0 mL/min, with catalyst **7** Rt = 12.47 (major), 10.31 (minor), 96:4 *er, syn/anti* = 94:6; Solid; Yield: 64% (30 mg);  $[\alpha]_{\text{D}}^{25} = -22.0$  (*c* 0.5,  $\text{CHCl}_3$ ); with catalyst **7a** Rt = 12.50 (major), 10.31 (minor), 91:9 *er, syn/anti* = 93:7; Yield: 60% (28 mg);  $[\alpha]_{\text{D}}^{25} = -20.4$  (*c* 0.54,  $\text{CHCl}_3$ ).

#### **(S)-2-((R)-1-(4-Fluorophenyl)-2-nitroethyl)cyclohexanone (10f)**<sup>5</sup>

Reaction was performed with 30 mg (0.17 mmol) of nitroolefin **9f**, 92  $\mu\text{L}$  (0.89 mmol) of cyclohexanone and 55  $\mu\text{L}$  catalyst solution **7** or **7a** following the general procedure.

<sup>1</sup>H NMR (500 MHz, CDCl<sub>3</sub>)  $\delta$ : 7.35-7.24 (m, 2H), 7.03-6.86 (m, 2H), 4.95 (dd,  $J$  = 12.6, 4.3 Hz, 1H), 4.61 (dd,  $J$  = 12.6, 10.0 Hz, 1H), 3.78 (dt,  $J$  = 9.8, 4.3 Hz, 1H), 2.65 (dt,  $J$  = 12.4, 4.9 Hz, 1H), 2.54-2.31 (m, 2H), 2.16-2.01 (m, 1H), 1.86-1.50 (m, 4H), 1.36-1.17 (m, 1H).

HPLC: chiral pak-IA column, 210 nm, isopropanol/hexane = 5:95, 1.0 mL/min, with catalyst **7** Rt = 16.20 (major), 14.19 (minor), 96:4 *er*, *syn/anti* = 93:7; Solid; Yield: 65% (30 mg);  $[\alpha]_{\text{D}}^{25}$  = -12.6 (*c* 1.2, CHCl<sub>3</sub>); with catalyst **7a** Rt = 16.02 (major), 14.04 (minor), 95:5 *er*, *syn/anti* = 95:5; Yield: 60% (28 mg);  $[\alpha]_{\text{D}}^{25}$  = -12.0 (*c* 1.2, CHCl<sub>3</sub>).

**(S)-2-((R)-1-(4-Methoxyphenyl)-2-nitroethyl)cyclohexanone (10g)**<sup>7,8</sup>

Reaction was performed with 30 mg (0.16 mmol) of nitroolefin **9g**, 86  $\mu$ L (0.83 mmol) of cyclohexanone and 51  $\mu$ L catalyst solution **7** or **7a** following the general procedure.

<sup>1</sup>H NMR (500 MHz, CDCl<sub>3</sub>)  $\delta$ : 7.08 (d,  $J$  = 8.6 Hz, 2H), 6.85 (d,  $J$  = 8.4 Hz, 2H), 4.91 (dd,  $J$  = 12.2, 4.5 Hz, 1H), 4.58 (dd,  $J$  = 12.2, 10.0 Hz, 1H), 3.87 (s, 3H), 3.77-3.66 (m, 1H), 2.64 (dt,  $J$  = 11.1, 4.7 Hz, 1H), 2.54-2.31 (m, 1H), 2.14-2.01 (m, 1H), 1.83-1.50 (m, 4H), 1.31-1.15 (m, 1H).

HPLC: chiral pak-IA column, 210 nm, isopropanol/hexane = 5:95, 1.0 mL/min, with catalyst **7** Rt = 18.49 (major), 15.29 (minor), 91:9 *er*, *syn/anti* = 95:5; White solid; Yield: 71% (32 mg);  $[\alpha]_{\text{D}}^{25}$  = -18.2 (*c* 0.4, CHCl<sub>3</sub>); with catalyst **7a** Rt = 18.52 (major), 15.28 (minor), 88:12 *er*, *syn/anti* = 94:6; Yield: 65% (30 mg);  $[\alpha]_{\text{D}}^{25}$  = -16.1 (*c* 0.41, CHCl<sub>3</sub>).

**(S)-2-((R)-2-Nitro-1-(4-(trifluoromethyl)phenyl)ethyl)cyclohexanone (10h)**<sup>6</sup>

Reaction was performed with 30 mg (0.13 mmol) of nitroolefin **9h**, 71  $\mu$ L (0.69 mmol) of cyclohexanone and 42  $\mu$ L of catalyst solution **7** or **7a** following the general procedure.

<sup>1</sup>H NMR (300 MHz, CDCl<sub>3</sub>)  $\delta$ : 7.59 (d,  $J$  = 7.5 Hz, 2H), 7.32 (d,  $J$  = 8.3 Hz, 2H), 4.98 (dd,  $J$  = 12.0, 3.7 Hz, 1H), 4.75-4.64 (m, 1H), 3.86 (dt,  $J$  = 9.8, 4.5 Hz, 1H), 2.77-2.64 (m, 1H), 2.55-2.31 (m, 2H), 2.18-2.00 (m, 1H), 1.87-1.50 (m, 4H), 1.36-1.16- (m, 1H).

HPLC: chiral pak-IA column, 210 nm, isopropanol/hexane = 6:94, 1.0 mL/min, with catalyst **7** Rt = 28.53 (major), 13.54 (minor), 99:1 *er*, *syn/anti* = 95:5; White Solid; Yield: 70% (30 mg);  $[\alpha]_{\text{D}}^{25}$  = -27.4 (*c* 0.4, CHCl<sub>3</sub>); with catalyst **7a** Rt = 28.40 (major), 13.54 (minor), 97:3 *er*, *syn/anti* = 93:7; Yield: 67% (29 mg);  $[\alpha]_{\text{D}}^{25}$  = -26.2 (*c* 0.41, CHCl<sub>3</sub>).

**(S)-2-((R)-1-(3-Bromophenyl)-2-nitroethyl)cyclohexanone (10i)**<sup>7</sup>

Reaction was performed with 30 mg (0.13 mmol) of nitroolefin **9i**, 68  $\mu$ L (0.66 mmol) of cyclohexanone and 41  $\mu$ L of catalyst solution **7** or **7a** following the general procedure.

<sup>1</sup>H NMR (500 MHz, CDCl<sub>3</sub>)  $\delta$ : 7.42-7.39 (m, 1H), 7.33 (t,  $J$  = 1.8 Hz, 1H), 7.21-7.18 (m, 1H), 7.14-7.11 (m, 1H), 4.94 (dd,  $J$  = 12.8, 4.4 Hz, 1H), 4.61 (dd,  $J$  = 12.8, 9.9 Hz, 1H), 3.74 (dt,  $J$  = 9.7, 4.4 Hz, 1H), 2.69-2.62 (m, 1H), 2.51-2.45 (m, 1H), 2.42-2.34 (m, 1H), 2.14-2.07 (m, 1H), 1.84-1.78 (m, 1H), 1.76-1.57 (m, 3H), 1.30-1.20 (m, 1);

HPLC: chiral pak-IA column, 210 nm, isopropanol/hexane = 5:95, 1.0 mL/min, with catalyst **7** Rt = 14.49 (major), 13.63 (minor), 82:18 *er*, *syn/anti* = 90:10; Solid; Yield: 66% (28 mg);  $[\alpha]_{\text{D}}^{25}$  = -28.0 (*c*

1, CHCl<sub>3</sub>); with catalyst **7a** Rt = 14.45 (major), 13.59 (minor), 68:32 *er*, *syn/anti* = 81:19; Yield: 60% (25 mg); [ $\alpha$ ]<sub>D</sub><sup>25</sup> = -25.0 (*c* 0.98, CHCl<sub>3</sub>).

**(S)-2-((R)-1-(Anthracen-9-yl)-2-nitroethyl)cyclohexanone (10j)**

Reaction was performed with 30 mg (0.12 mmol) of nitroolefin **9j**, 62  $\mu$ L (0.60 mmol) of cyclohexanone and 37  $\mu$ L of catalyst solution **7** or **7a** following the general procedure.

Solid; m.p 199-201 °C; IR ( $\nu_{\max}$ ): 2934, 1707, 1554, 1215, 758 cm<sup>-1</sup>; <sup>1</sup>H NMR (500 MHz, CDCl<sub>3</sub>)  $\delta$ : 8.55 (d, *J* = 9.0 Hz, 1H), 8.43 (s, 1H), 8.07 (d, *J* = 8.4 Hz, 1H), 8.00 (d, *J* = 8.4 Hz, 1H), 7.91 (d, *J* = 8.9 Hz, 1H), 7.61-7.46 (m, 4H), 5.76-5.70 (m, 1H), 5.20 (dd, *J* = 13.4, 4.6 Hz, 1H), 5.11 (dd, *J* = 13.1, 7.3 Hz, 1H), 3.49 (td, *J* = 5.3, 11.6, 16.9 Hz, 1H), 2.63-2.57 (m, 1H), 2.48 (td, *J* = 6.1, 13.3, 19.4 Hz, 1H), 2.10-2.01 (m, 1H), 1.72-1.52 (m, 3H), 1.52-1.49 (m, 1H), 1.38-1.23 (m, 1H); <sup>13</sup>C NMR (125 MHz, CDCl<sub>3</sub>)  $\delta$ : 212.0, 131.9, 131.6, 131.6, 130.3, 129.3, 129.2, 128.5, 126.9, 126.2, 125.1, 124.6, 124.0, 123.5, 79.7, 53.3, 42.6, 36.3, 32.9, 29.6, 28.2, 25.2; HRMS (ESI): *m/z* calculated for [C<sub>22</sub>H<sub>21</sub>NNaO<sub>3</sub>] 370.1414 [M+Na]<sup>+</sup>, found 370.1420.

HPLC: chiral pak-IA column, 210 nm, isopropanol/hexane = 8:92, 1.0 mL/min, with catalyst **7** Rt = 22.02 (major), 15.33 (minor), 95:5 *er*, *syn/anti* = 94:6; Yield: 73% (30 mg); [ $\alpha$ ]<sub>D</sub><sup>25</sup> = -34.2 (*c* 1, CHCl<sub>3</sub>); with catalyst **7a** Rt = 22.00 (major), 15.33 (minor), 95:5 *er*, *syn/anti* = 97:3; Yield: 69% (28 mg); [ $\alpha$ ]<sub>D</sub><sup>25</sup> = -32.0 (*c* 1.09, CHCl<sub>3</sub>).

**(S)-3-((R)-2-Nitro-1-phenylethyl)dihydro-2H-thiopyran-4(3H)-one (10k)<sup>7</sup>**

Reaction was performed with 30 mg (0.20 mmol) of nitroolefin **9k**, 70 mg (0.60 mmol) of dihydro-2H-thiopyran-4-one and 62  $\mu$ L of catalyst solution **7** or **7a** following the general procedure.

Solid; <sup>1</sup>H NMR (500 MHz, CDCl<sub>3</sub>)  $\delta$ : 7.38-7.28 (m, 3H), 7.22-7.19 (m, 2H), 4.74 (dd, *J* = 12.6 4.5 Hz, 1H), 4.63 (dd, *J* = 12.5, 9.6 Hz, 1H), 3.98 (dt, *J* = 10.2, 4.5 Hz, 1H), 3.05 (dt, *J* = 9.7, 4.2 Hz, 1H), 3.01-2.96 (m, 2H), 2.88-2.77 (m, 2H), 2.62 (ddd, *J* = 13.8, 4.2, 1.8 Hz, 1H), 2.46 (dd, *J* = 9.3, 13.7 Hz, 1H).

HPLC: chiral pak-IC column, 210 nm, isopropanol/hexane = 10:90, 1.0 mL/min. with catalyst **7** Rt = 26.38 (major), 35.45 (minor), 93:7 *er*, *syn/anti* = 96:4; Yield: 70% (37 mg); [ $\alpha$ ]<sub>D</sub><sup>25</sup> = -24.6 (*c* 1, CHCl<sub>3</sub>); with catalyst **7a** Rt = 26.41 (major), 35.43 (minor), 89:11 *er*, *syn/anti* = 95:5; Yield: 66% (35 mg); [ $\alpha$ ]<sub>D</sub><sup>25</sup> = -26.2 (*c* 0.91, CHCl<sub>3</sub>).

**(S)-4-(3-Methylthiophen-2-yl)-5-nitropentan-2-one (10l)**

Reaction was performed with 30 mg (0.17 mmol) of nitroolefin **9l**, 130  $\mu$ L (1.77 mmol) of acetone and 55  $\mu$ L of catalyst solution **7** or **7a** following the general procedure.

Viscous oil; IR ( $\nu_{\max}$ ): 2926, 1717, 1554, 1378, 758 cm<sup>-1</sup>; <sup>1</sup>H NMR (300 MHz, CDCl<sub>3</sub>)  $\delta$ : 7.11 (d, *J* = 5.1 Hz, 1H), 6.77 (d, *J* = 4.9 Hz, 1H), 4.69-4.60 (m, 1H), 4.55-4.37 (m, 2H), 2.96-2.86 (m, 2H), 2.25 (s, 3H), 2.13 (s, 3H); <sup>13</sup>C NMR (125 MHz, CDCl<sub>3</sub>)  $\delta$ : 204.9, 135.3, 134.9, 130.3, 122.9, 79.5, 47.1, 32.7, 30.3, 13.6 ; HRMS (ESI): *m/z* calculated for [C<sub>10</sub>H<sub>13</sub>NNaO<sub>3</sub>S] 250.0508 [M+Na]<sup>+</sup>, found 250.0537.

HPLC: chiral pak-IC column, 210 nm, isopropanol/hexane = 10:90, 1.0 mL/min, with catalyst **7** Rt = 16.96 (major), 15.58 (minor), 68:32 *er*; Yield: 50% (20 mg);  $[\alpha]_{\text{D}}^{25} = -8.5$  (*c* 1., CHCl<sub>3</sub>); with catalyst **7a** Rt = 17.01 (major), 15.64 (minor), 65:35 *er*; Yield: 45% (18 mg);  $[\alpha]_{\text{D}}^{25} = -11.0$  (*c* 0.94, CHCl<sub>3</sub>).

**(R)-5-Nitro-4-phenylpentan-2-one (10m)**<sup>5,7</sup>

Reaction was performed with 30 mg (0.20 mmol) of nitroolefin **9m**, 147  $\mu\text{L}$  (2.01 mmol) of acetone and 62  $\mu\text{L}$  of catalyst solution **7** or **7a** following the general procedure.

Solid; <sup>1</sup>H NMR (300 MHz, CDCl<sub>3</sub>)  $\delta$ : 7.35–7.22 (m, 5H), 4.75–4.51 (m, 2H), 4.05–4.00 (m, 1H), 2.94 (d, *J* = 6.6 Hz, 2H), 2.14 (s, 3H).

HPLC: chiral pak-IA column, 210 nm, hexane/isopropanol = 94:6, 1.0 mL/min, with catalyst **7** Rt = 12.19 (major), 11.33 (minor), 68:32 *er*; Yield: 56% (23 mg);  $[\alpha]_{\text{D}}^{25} = -5.7$  (*c* 0.7, CHCl<sub>3</sub>); with catalyst **7a** Rt = 12.21 (major), 11.34 (minor), 63:37 *er*; Yield: 50% (20 mg);  $[\alpha]_{\text{D}}^{25} = -3.8$  (*c* 0.71, CHCl<sub>3</sub>).

**(R)-4-(3-(Benzyloxy)phenyl)-5-nitropentan-2-one (10n)**

Reaction was performed with 30 mg (0.11 mmol) of nitroolefin **9n**, 86  $\mu\text{L}$  (1.17 mmol) of acetone and 36  $\mu\text{L}$  of catalyst solution **7** or **7a** following the general procedure.

Viscous oil; IR ( $\nu_{\text{max}}$ ): 2925, 1716, 1553, 1379, 1258, 756 cm<sup>-1</sup>; <sup>1</sup>H NMR (300 MHz, CDCl<sub>3</sub>)  $\delta$ : 7.47–7.19 (m, 6H), 6.91–6.71 (m, 3H), 5.02 (s, 2H), 4.69–4.50 (m, 2H), 4.01–3.90 (m, 1H), 2.86 (d, *J* = 7.0 Hz, 2H), 2.09 (s, 3H); <sup>13</sup>C NMR (125 MHz, CDCl<sub>3</sub>)  $\delta$ : 205.2, 159.0, 140.3, 136.6, 130.0, 128.5, 127.9, 127.4, 119.7, 114.3, 113.7, 79.2, 69.9, 45.9, 38.9, 30.2; HRMS (ESI): *m/z* calculated for [C<sub>18</sub>H<sub>19</sub>NNaO<sub>4</sub>] 336.1206 [M+Na]<sup>+</sup>, found 336.1234.

HPLC: chiral pak-IC column, 210 nm, hexane/isopropanol = 75:15, 1.0 mL/min, with catalyst **7** Rt = 19.04 (major), 20.23 (minor), 69:31 *er*; Yield: 53% (19 mg);  $[\alpha]_{\text{D}}^{25} = -9.07$  (*c* 0.86, CHCl<sub>3</sub>); with catalyst **7a** Rt = 19.09 (major), 20.30 (minor), 67:33 *er*; Yield: 50% (18 mg);  $[\alpha]_{\text{D}}^{25} = -7.06$  (*c* 0.7, CHCl<sub>3</sub>).

-----  
5. S.R. Ban, X. X. Zhu, Z. P. Zhang, H. Y. Xie, Q. S. Li., *Eur. J. Org. Chem.* **2013**, 2977-2980.

6. A. Lu, R. Wu, Y. Wang, Z. Zhou, G. Wu, J. Fang, C. Tang. *Eur. J. Org. Chem.*, **2010**, 2057-2061.

7. P. Li, L. Wang, Y. Zhang, G. Wang., *Tetrahedron*, **2008**, *64*, 7633-7638.

8. V. Maya, V. K. Singh., *Org. Lett.*, **2007**, *9*, 1117-1119

## 5. $^1\text{H}$ and $^{13}\text{C}$ NMR SPECTRA

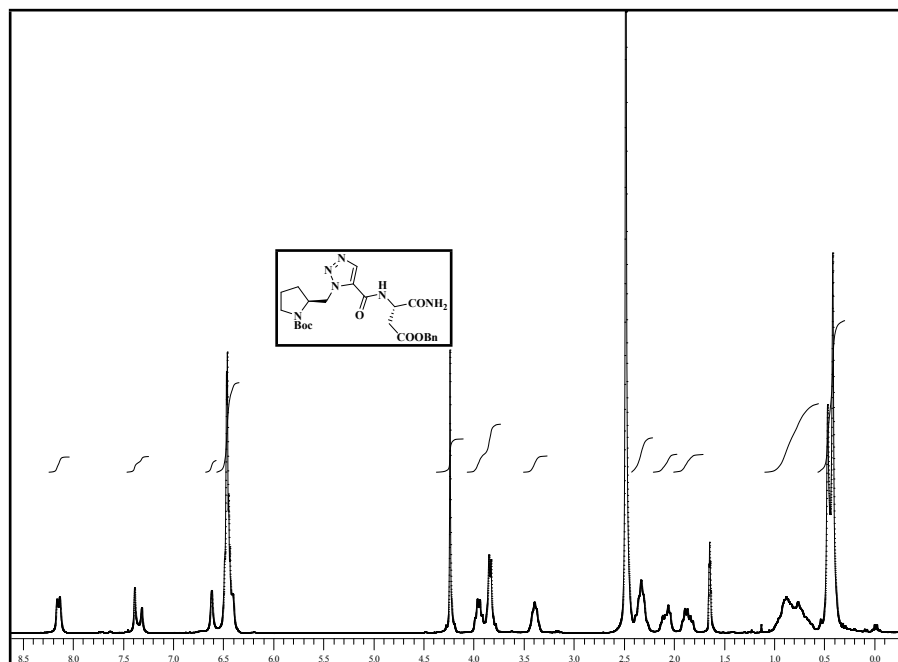

$^1\text{H}$  NMR OF COMPOUND **5** ( $\text{DMSO}-d_6$ , 300 MHz)

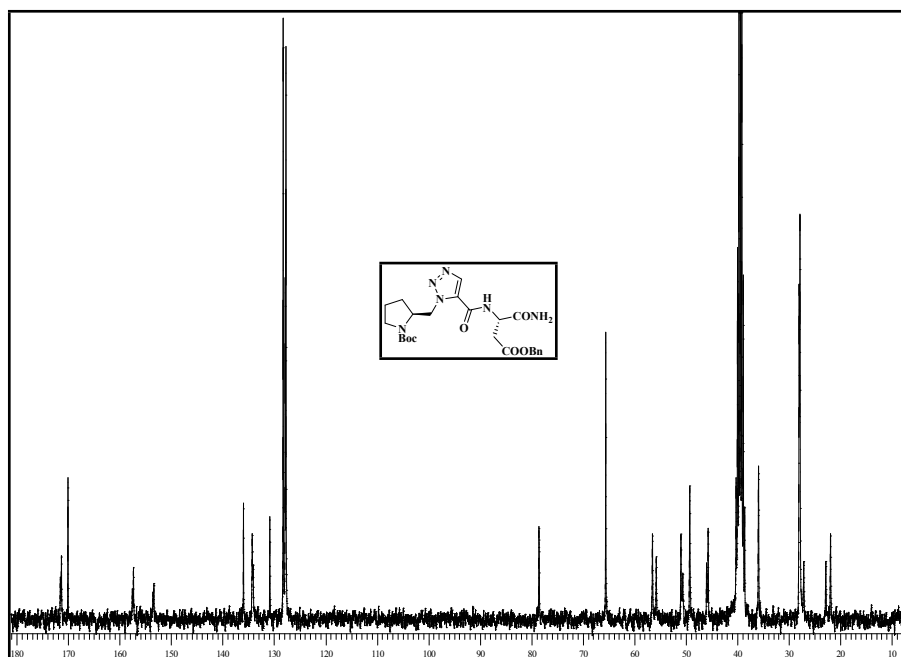

$^{13}\text{C}$  NMR OF COMPOUND **5** ( $\text{DMSO}-d_6$ , 75 MHz)



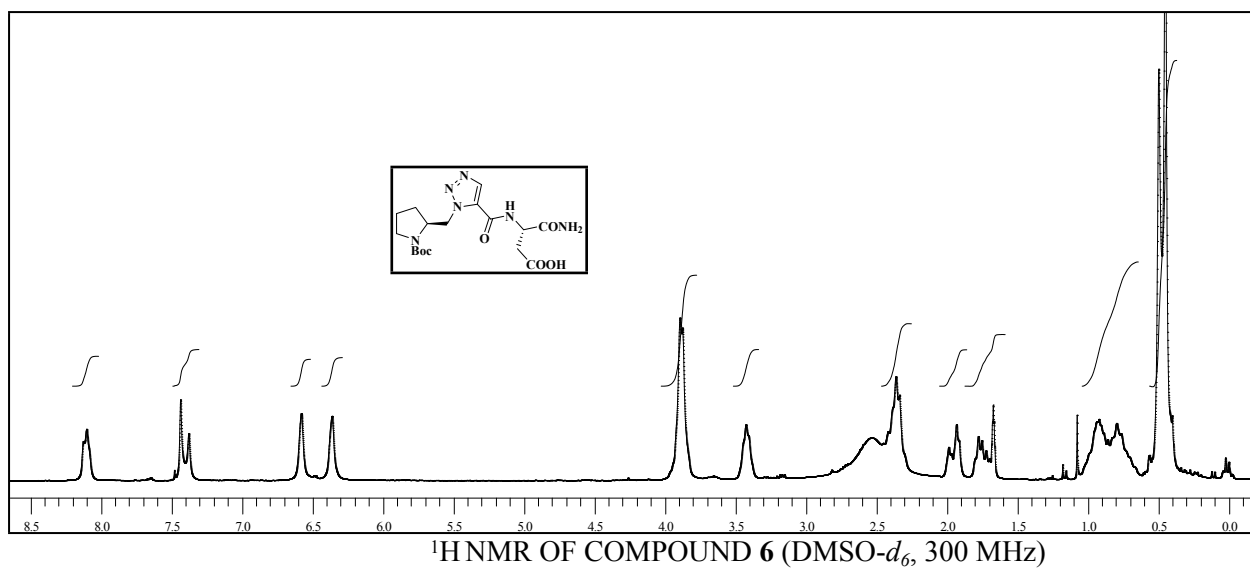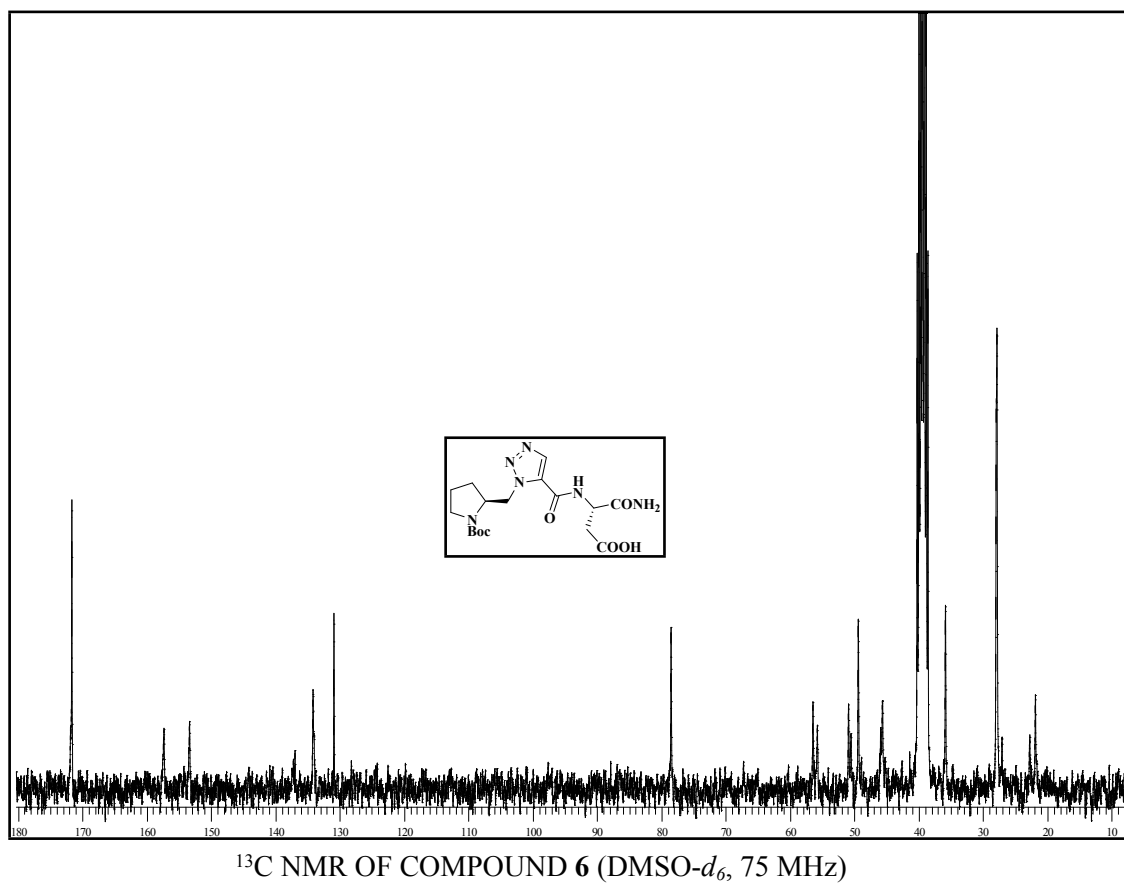

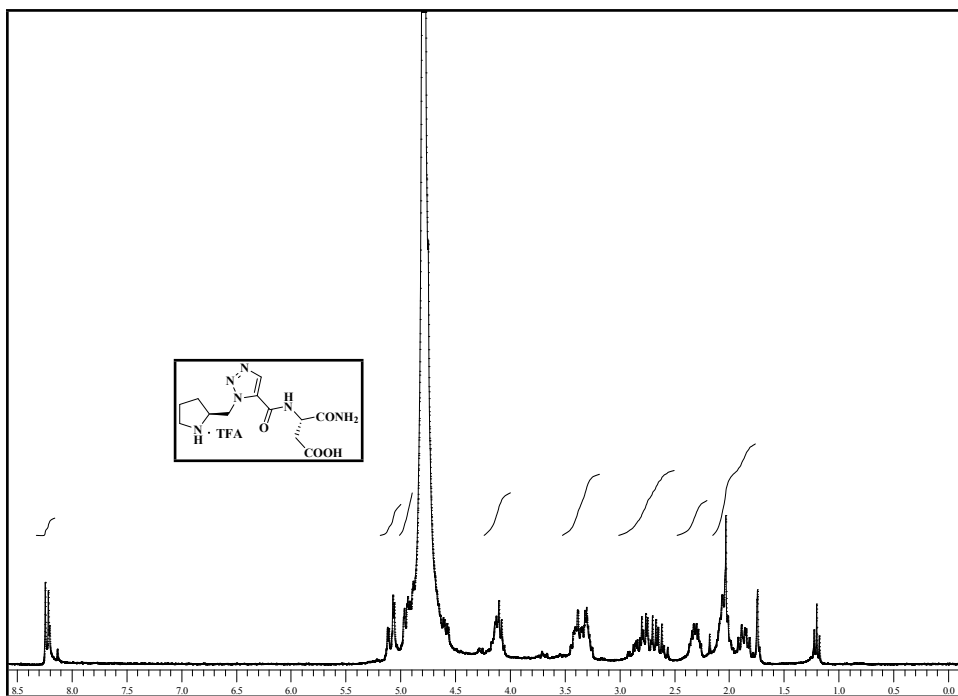

$^1\text{H}$  NMR OF COMPOUND 7 ( $\text{D}_2\text{O}$ , 300 MHz)

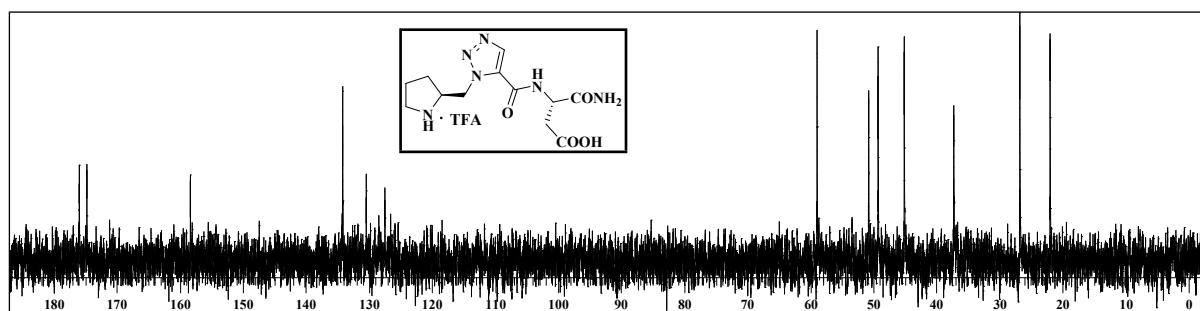

$^{13}\text{C}$  NMR OF COMPOUND 7 ( $\text{D}_2\text{O}$ , 75 MHz)

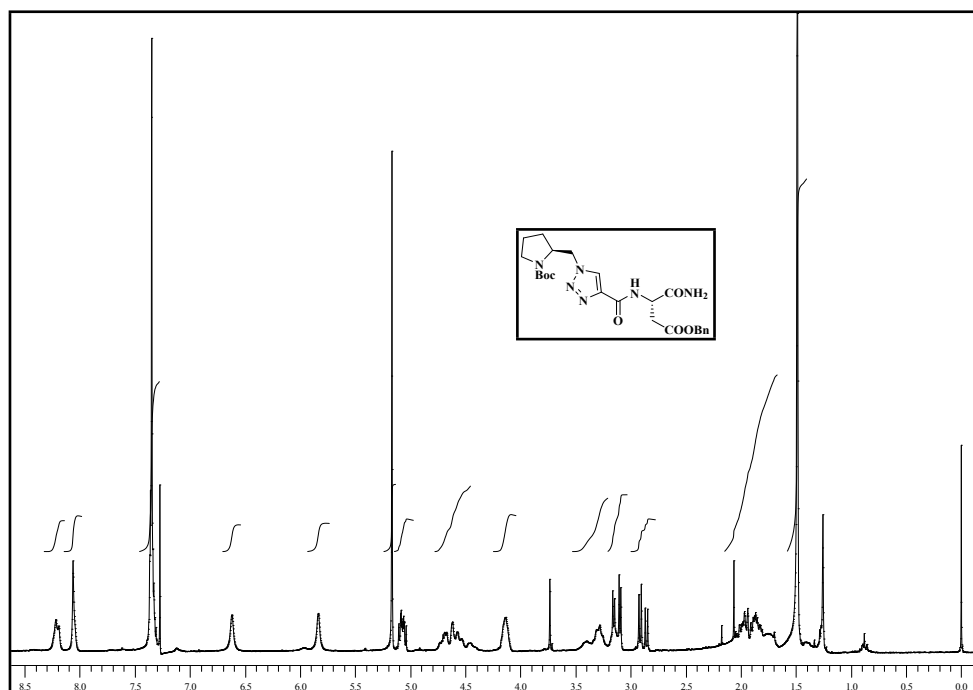

$^1\text{H}$  NMR OF COMPOUND **5a** ( $\text{CDCl}_3$ , 300 MHz)

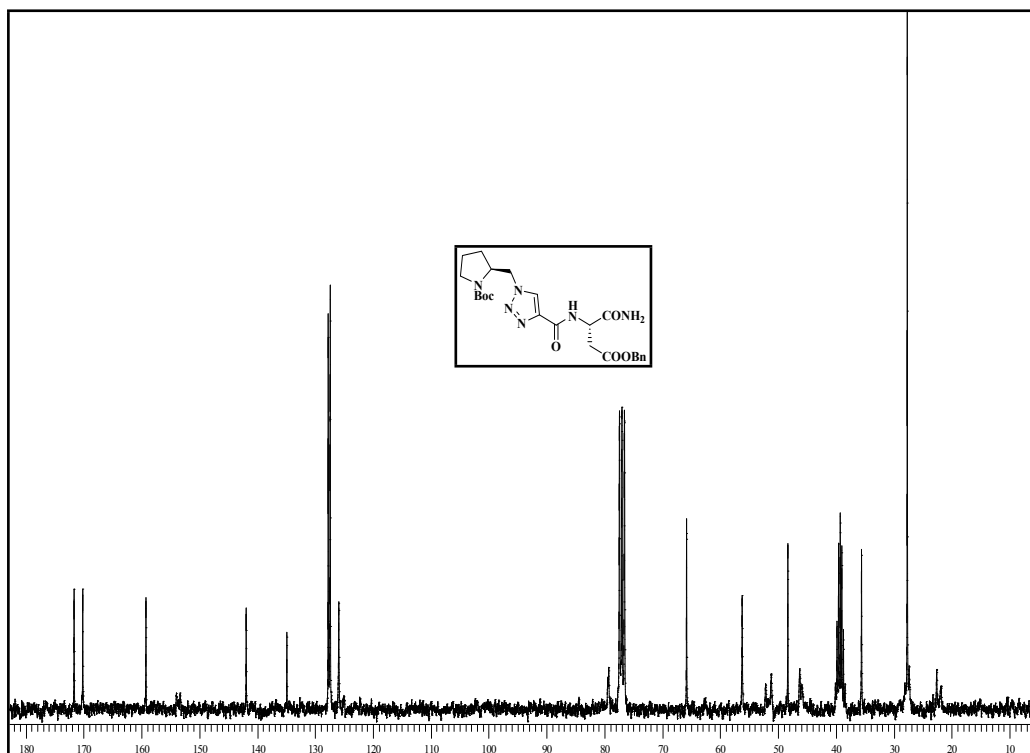

$^{13}\text{C}$  NMR OF COMPOUND **5a** ( $\text{CDCl}_3 + \text{DMSO}-d_6$ , 75MHz)

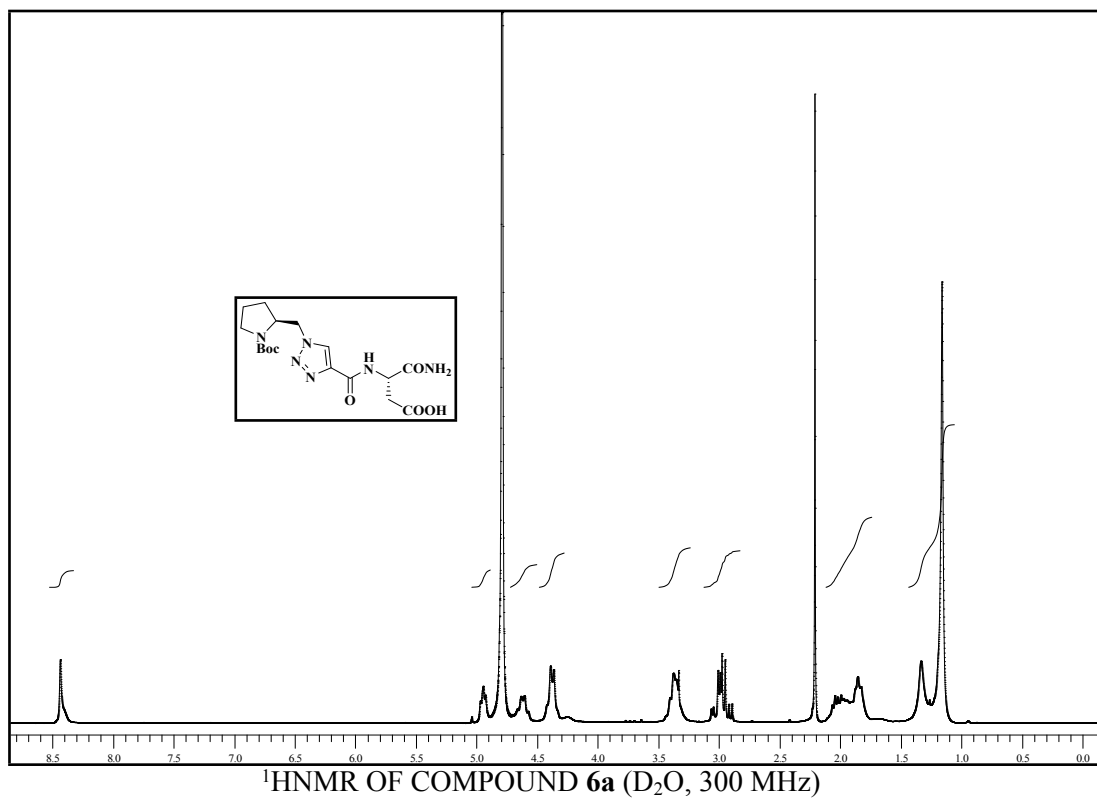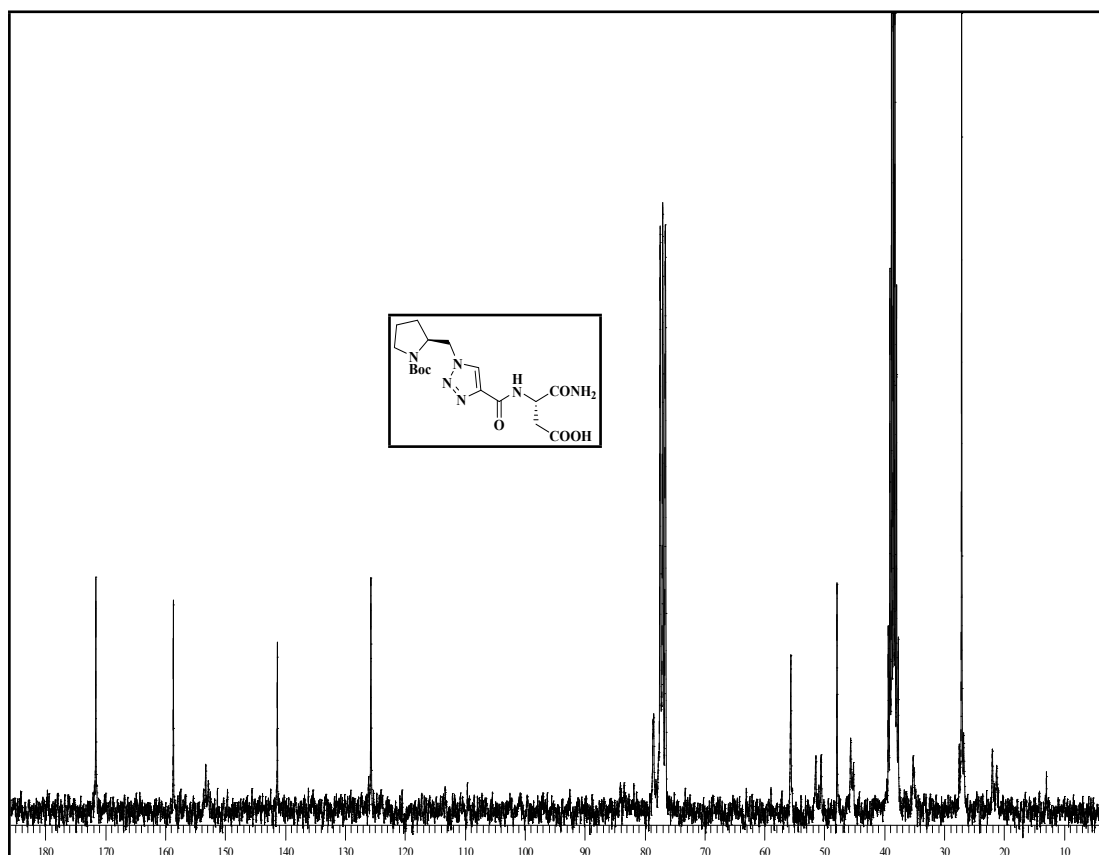

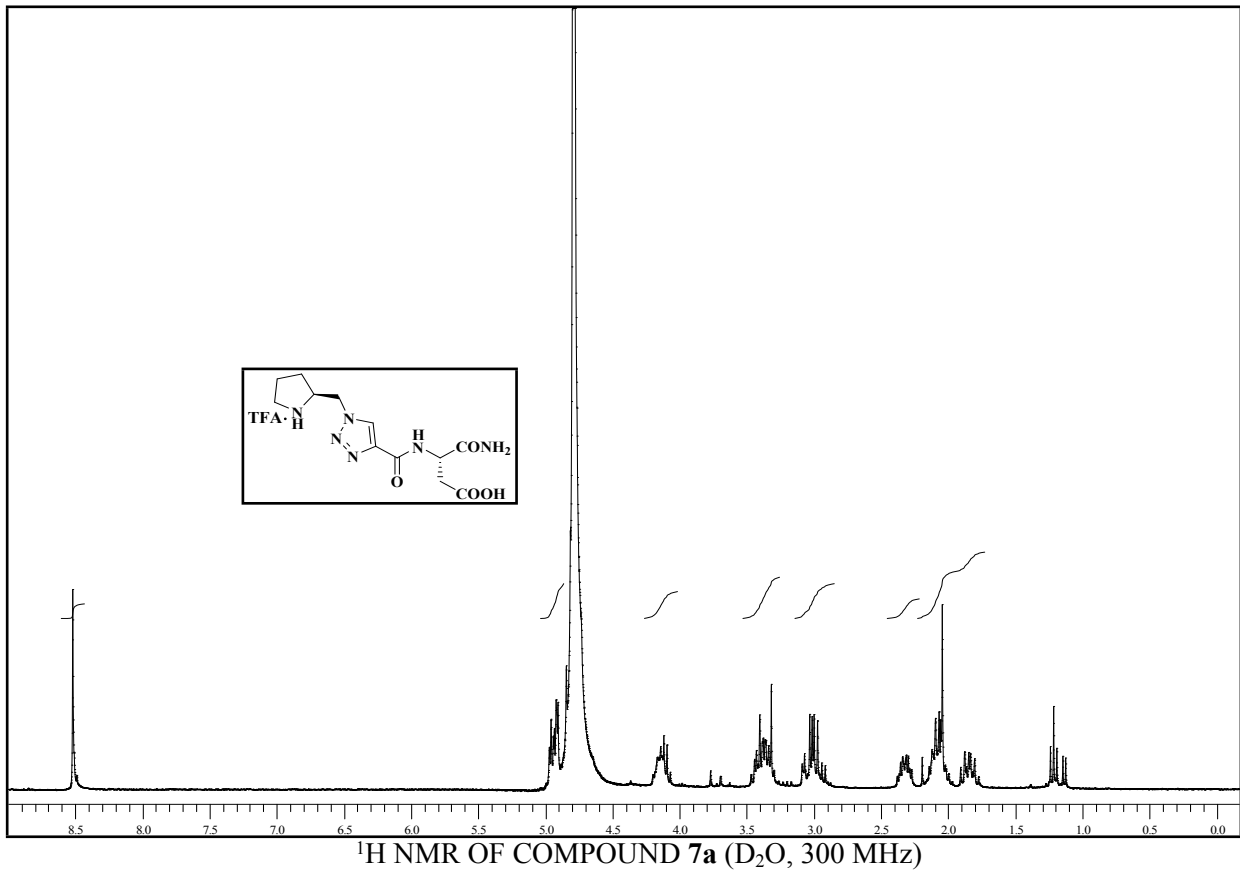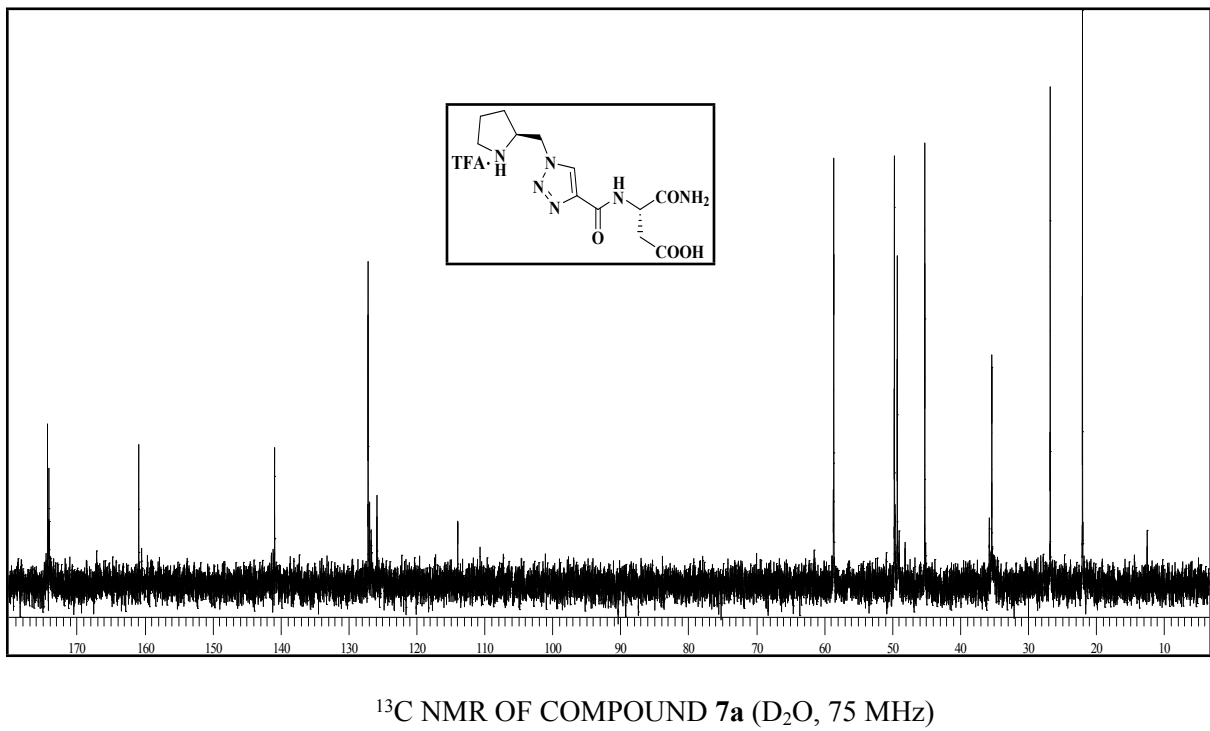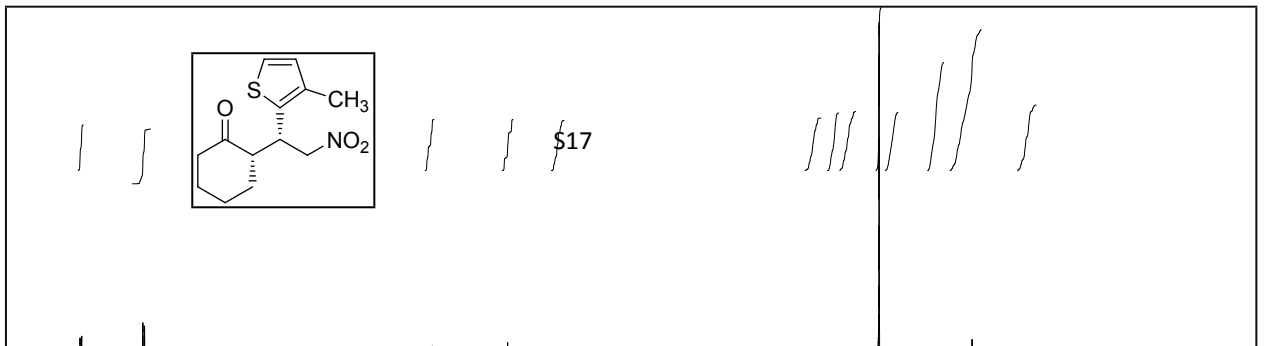

$^1\text{H}$  NMR OF COMPOUND **10b** ( $\text{CDCl}_3$ , 500 MHz)

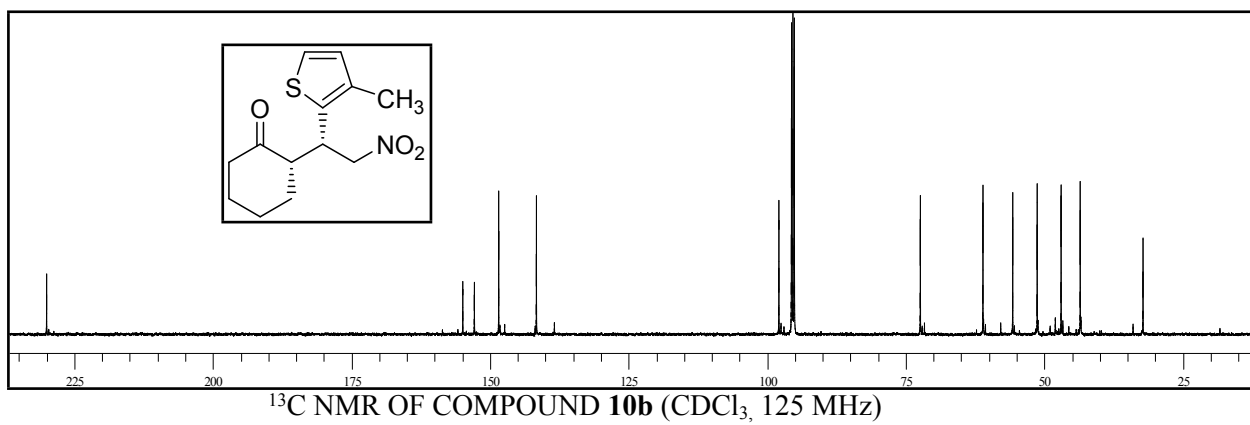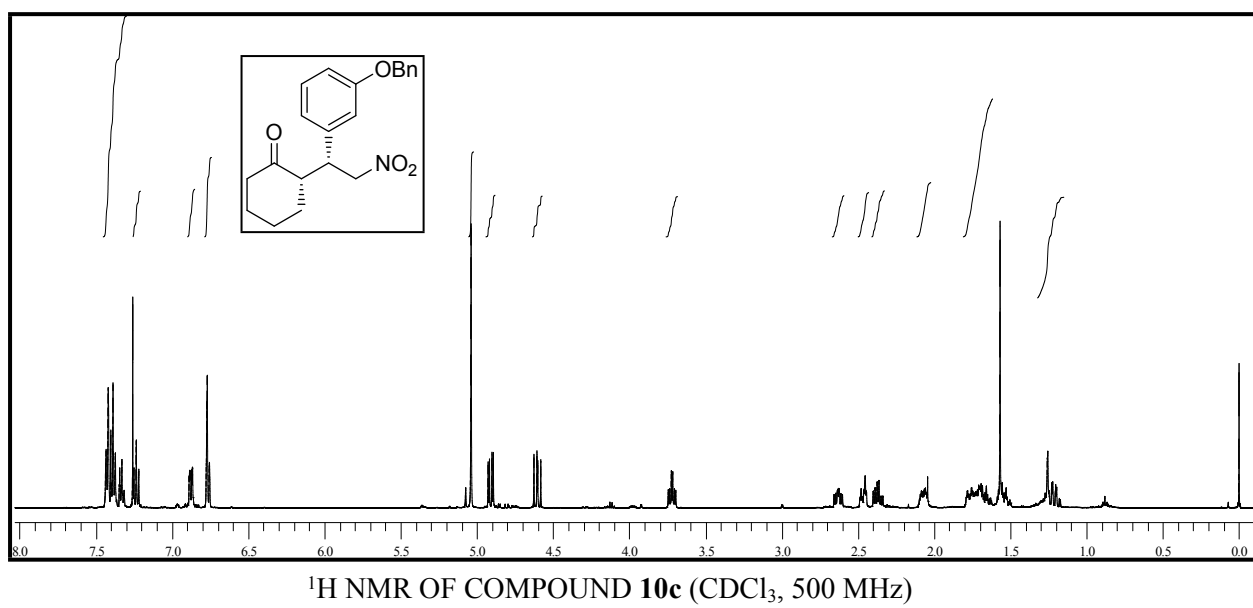

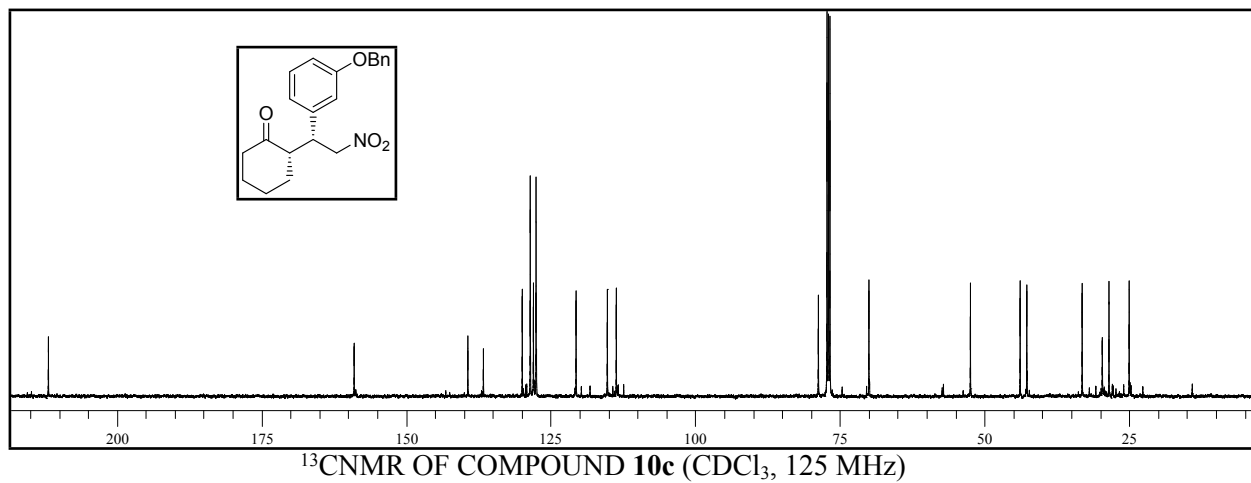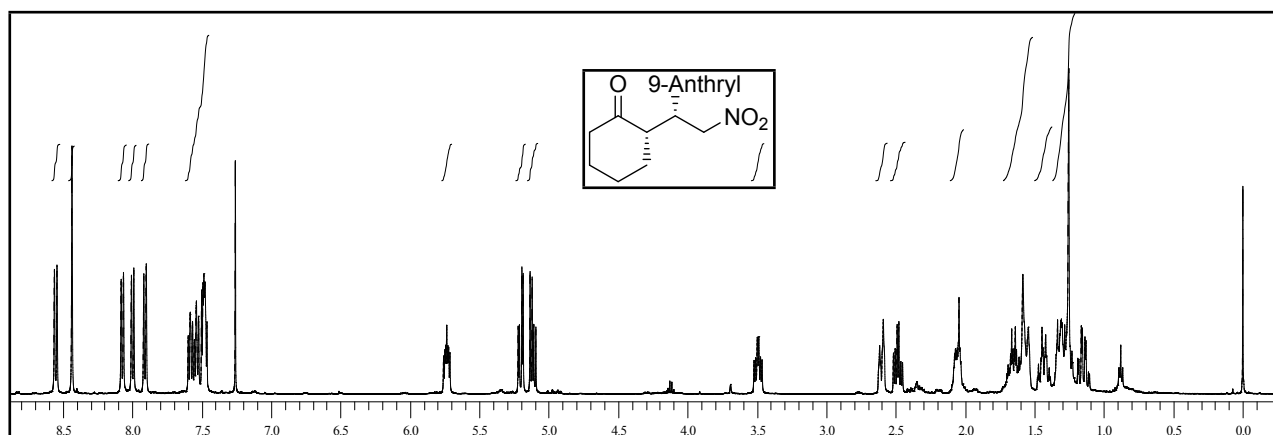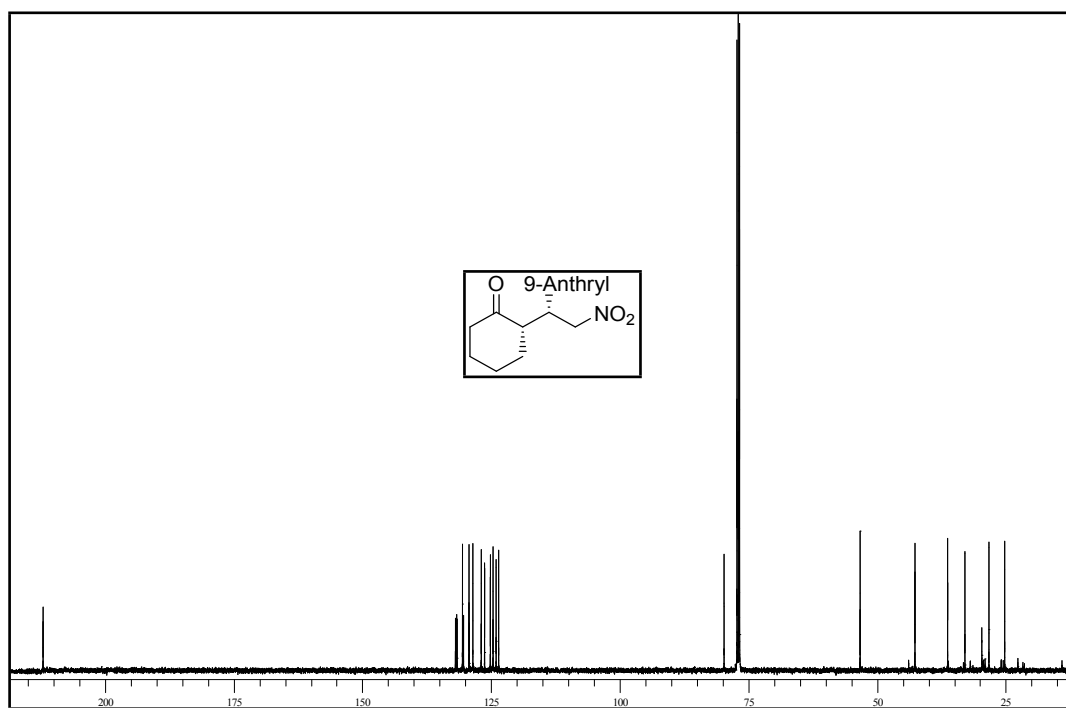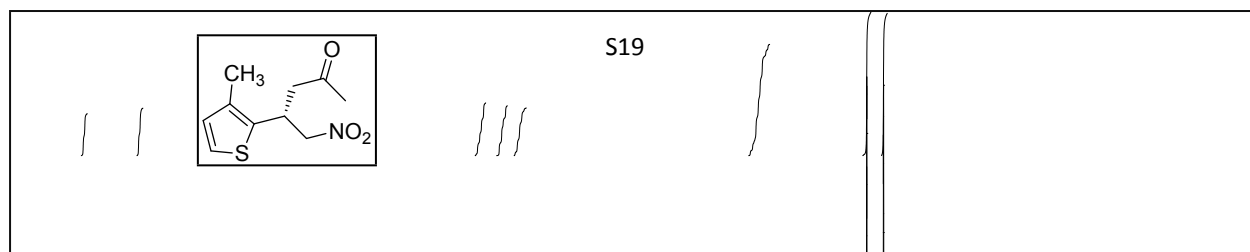

$^1\text{H}$  NMR OF COMPOUND **10i** ( $\text{CDCl}_3$ , 300 MHz)

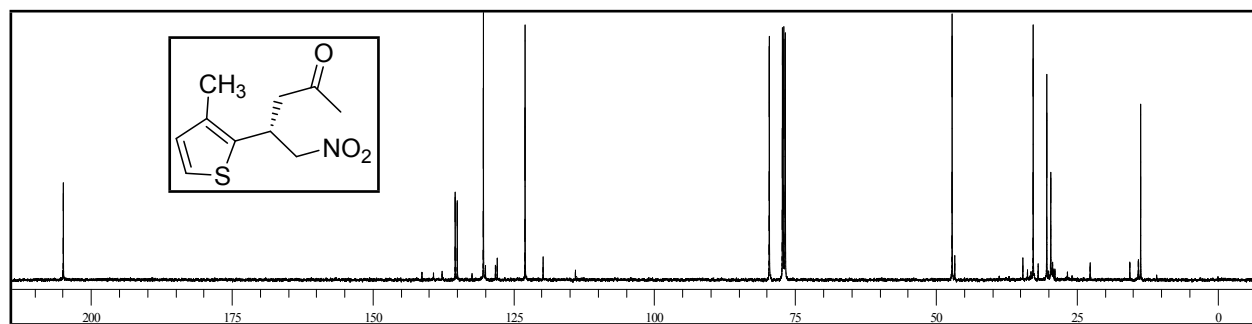

$^{13}\text{C}$  NMR OF COMPOUND **10i** ( $\text{CDCl}_3$ , 125 MHz)

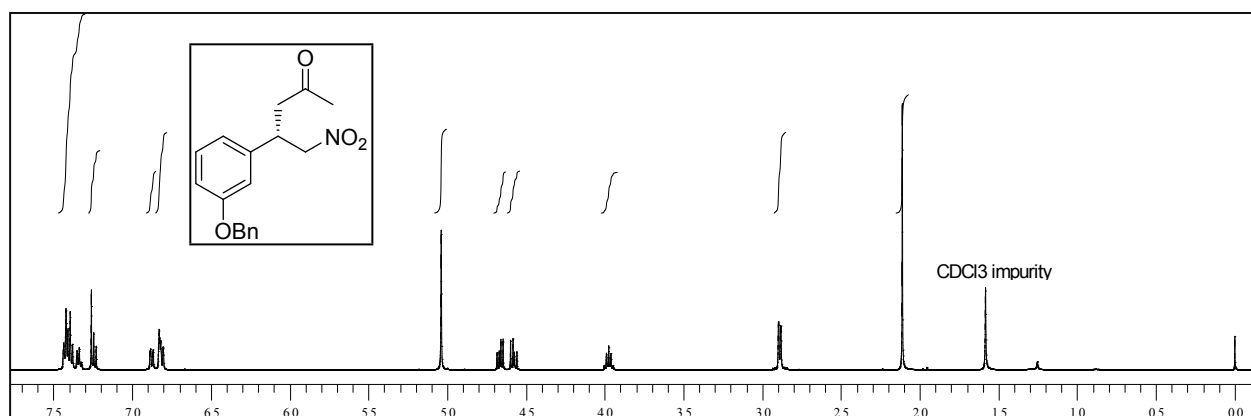

$^1\text{H}$  NMR OF COMPOUND **10n** ( $\text{CDCl}_3$ , 300 MHz)



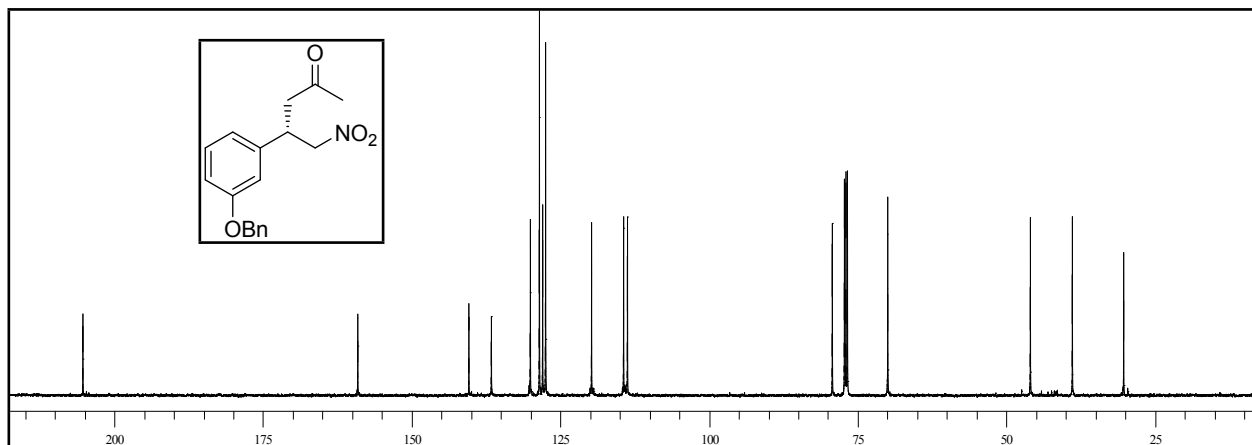

$^{13}\text{C}$  NMR OF COMPOUND **10n** ( $\text{CDCl}_3$ , 125MHz)

## 6. HPLC CHROMATOGRAMS OF THE COMPOUNDS 10a-10n

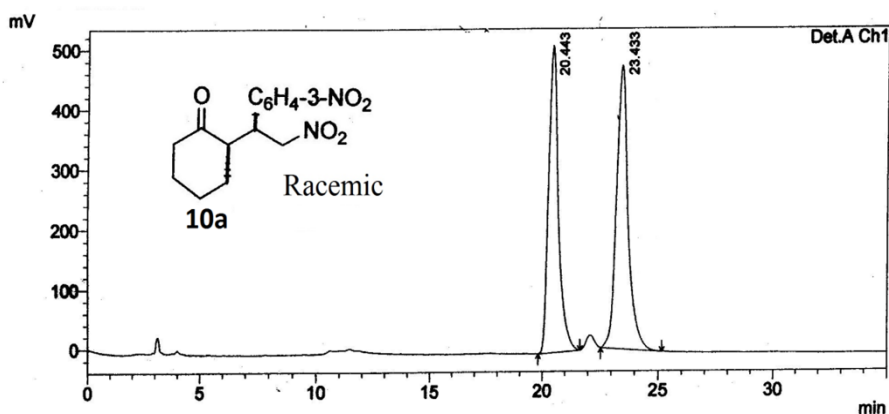

Detector A Ch1 210nm

| Peak# | Ret. Time | Area     | Height | Area %  |
|-------|-----------|----------|--------|---------|
| 1     | 20.443    | 15450248 | 512996 | 48.460  |
| 2     | 23.433    | 16431972 | 474309 | 51.540  |
| Total |           | 31882220 | 987305 | 100.000 |

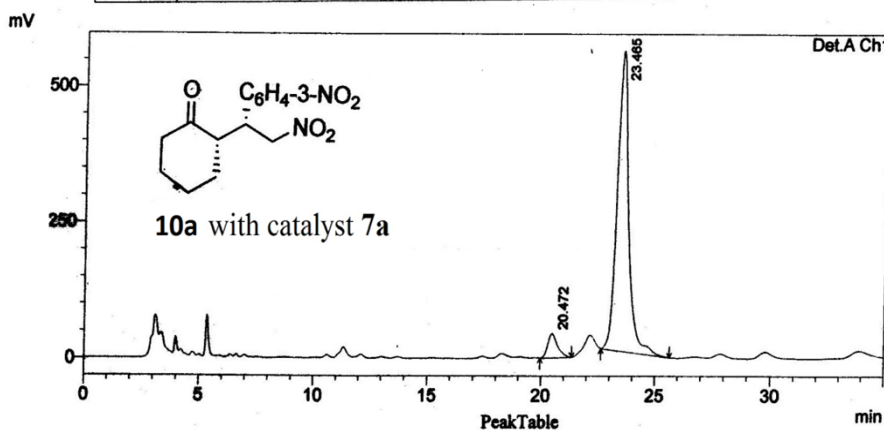

Detector A Ch1 210nm

| Peak# | Ret. Time | Area     | Height | Area %  |
|-------|-----------|----------|--------|---------|
| 1     | 20.472    | 1311013  | 43868  | 6.347   |
| 2     | 23.465    | 19343946 | 553398 | 93.653  |
| Total |           | 20654958 | 597266 | 100.000 |

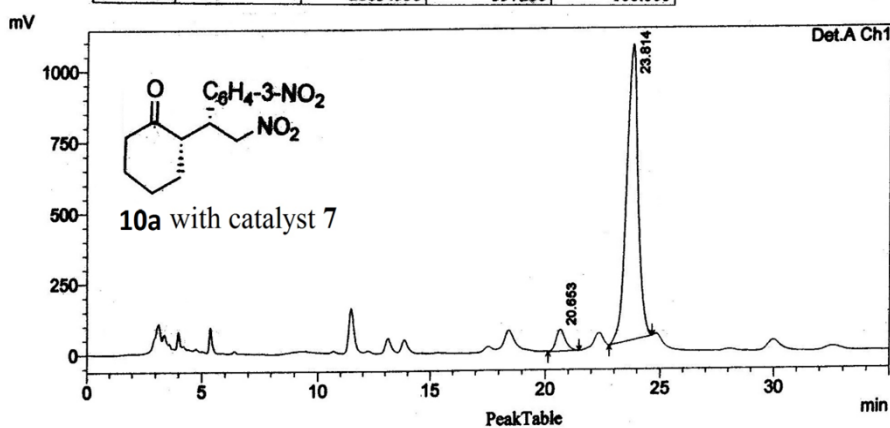

Detector A Ch1 210nm

| Peak# | Ret. Time | Area     | Height  | Area %  |
|-------|-----------|----------|---------|---------|
| 1     | 20.653    | 2112212  | 76048   | 5.515   |
| 2     | 23.814    | 36188964 | 1041373 | 94.485  |
| Total |           | 38301176 | 1117421 | 100.000 |

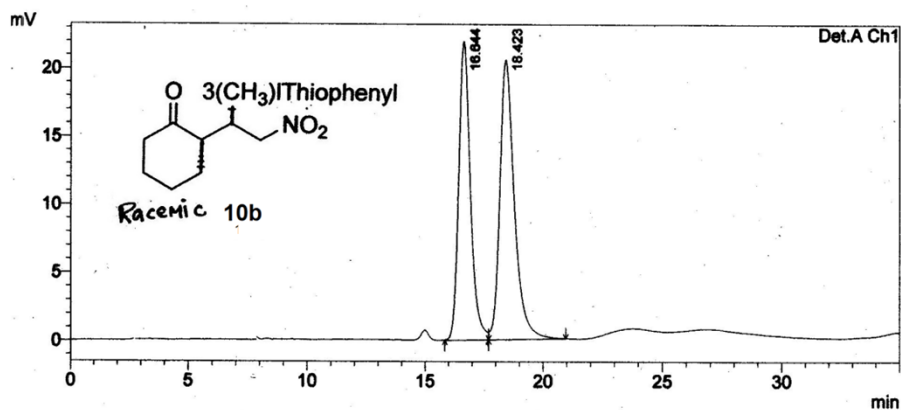

Detector A Ch1 210nm

| Peak# | Ret. Time | Area    | Height | Area %  |
|-------|-----------|---------|--------|---------|
| 1     | 16.644    | 757441  | 21953  | 46.387  |
| 2     | 18.423    | 875441  | 20540  | 53.613  |
| Total |           | 1632882 | 42493  | 100.000 |

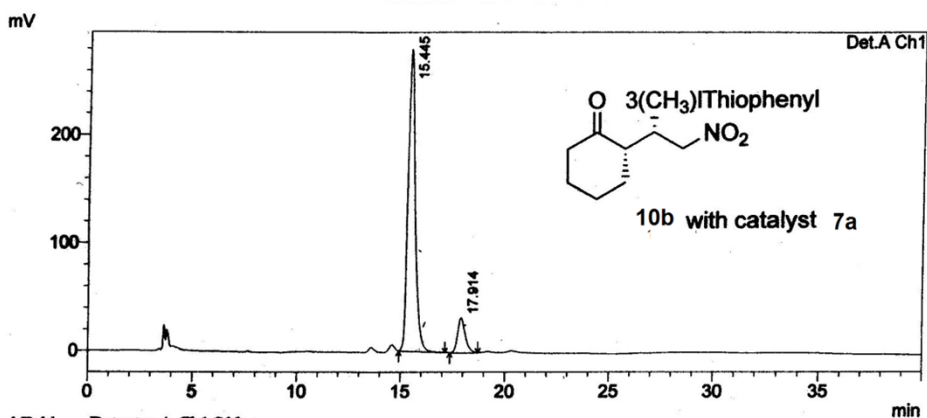

Detector A Ch1 210nm

| Peak# | Ret. Time | Area    | Height | Area %  |
|-------|-----------|---------|--------|---------|
| 1     | 15.445    | 6714386 | 279879 | 88.952  |
| 2     | 17.914    | 833966  | 32621  | 11.048  |
| Total |           | 7548351 | 312500 | 100.000 |

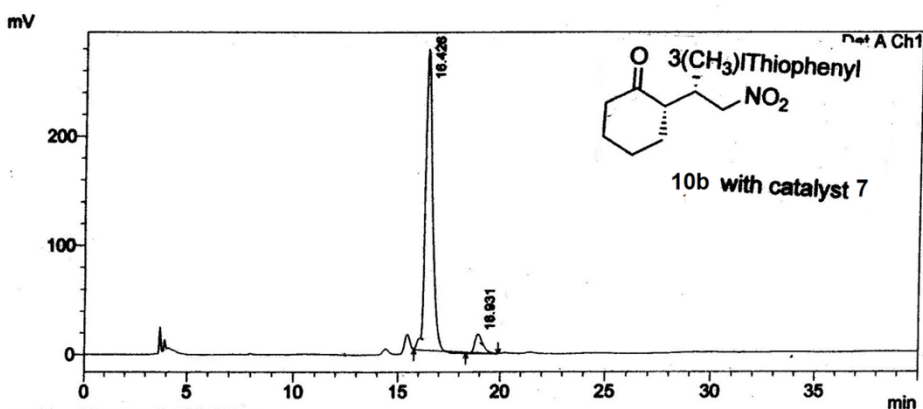

Detector A Ch1 210nm

| Peak# | Ret. Time | Area    | Height | Area %  |
|-------|-----------|---------|--------|---------|
| 1     | 16.426    | 6535153 | 275259 | 93.222  |
| 2     | 18.931    | 475171  | 17754  | 6.778   |
| Total |           | 7010324 | 293013 | 100.000 |

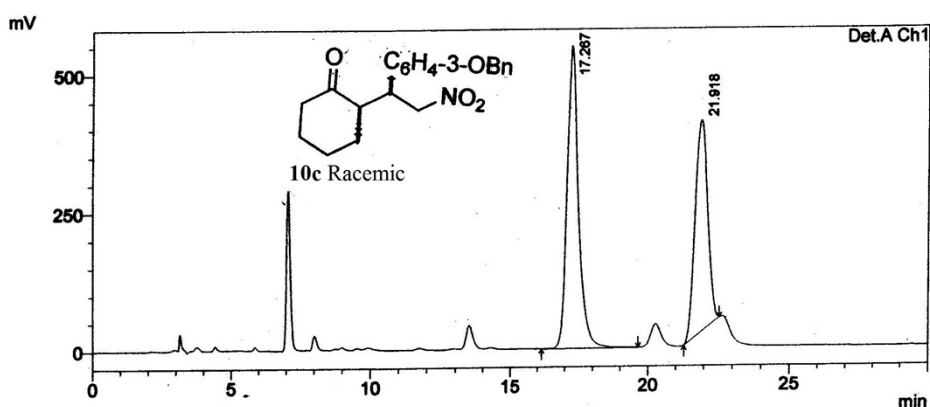

PeakTable Detector A Ch1 210nm

| Peak# | Ret. Time | Area     | Height | Area %  |
|-------|-----------|----------|--------|---------|
| 1     | 17.267    | 15576899 | 549147 | 56.796  |
| 2     | 21.918    | 11849326 | 383010 | 43.204  |
| Total |           | 27426225 | 932156 | 100.000 |

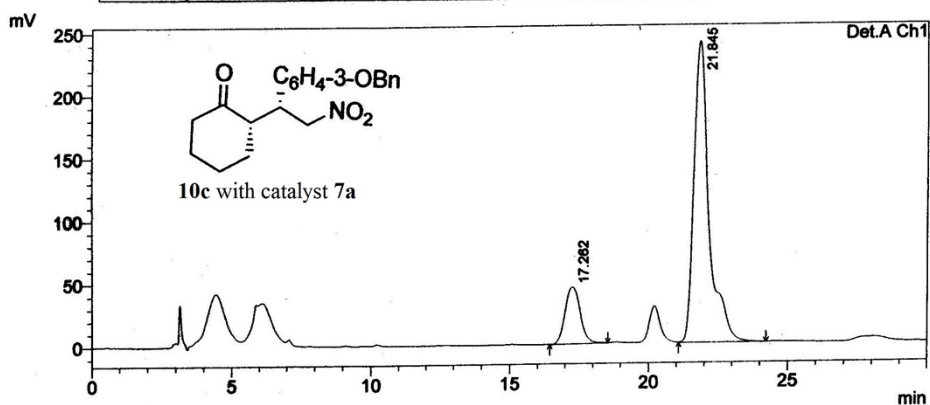

PeakTable Detector A Ch1 210nm

| Peak# | Ret. Time | Area     | Height | Area %  |
|-------|-----------|----------|--------|---------|
| 1     | 17.262    | 1709310  | 45199  | 15.863  |
| 2     | 21.845    | 9066326  | 240297 | 84.137  |
| Total |           | 10775636 | 285495 | 100.000 |

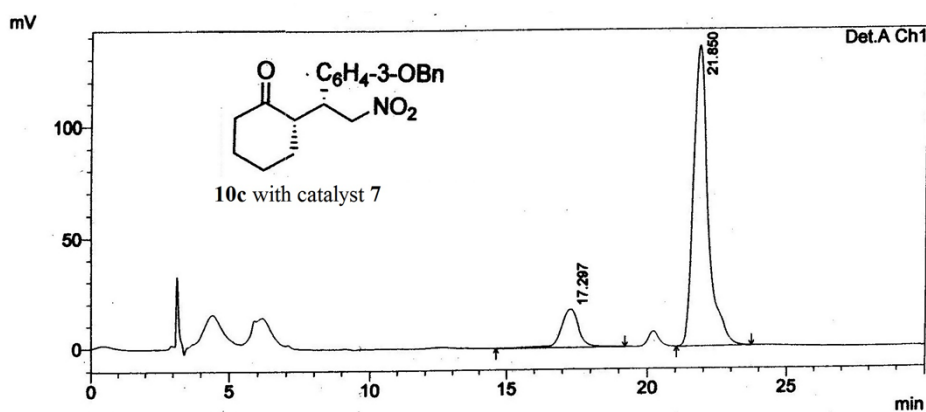

PeakTable Detector A Ch1 210nm

| Peak# | Ret. Time | Area    | Height | Area %  |
|-------|-----------|---------|--------|---------|
| 1     | 17.297    | 746356  | 17168  | 13.210  |
| 2     | 21.850    | 4903631 | 135770 | 86.790  |
| Total |           | 5649988 | 152938 | 100.000 |

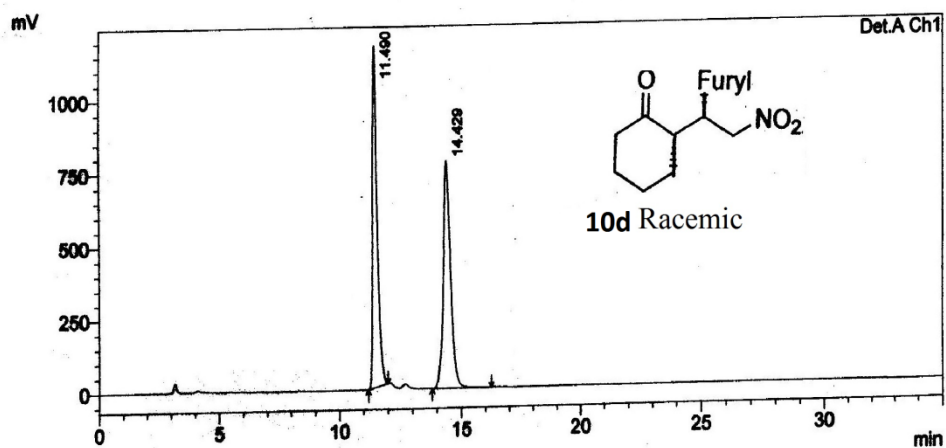

PeakTable

| Peak# | Ret. Time | Area     | Height  | Area %  |
|-------|-----------|----------|---------|---------|
| 1     | 11.490    | 15448318 | 1172595 | 48.503  |
| 2     | 14.429    | 16462166 | 781060  | 51.497  |
| Total |           | 31890484 | 1953654 | 100.000 |

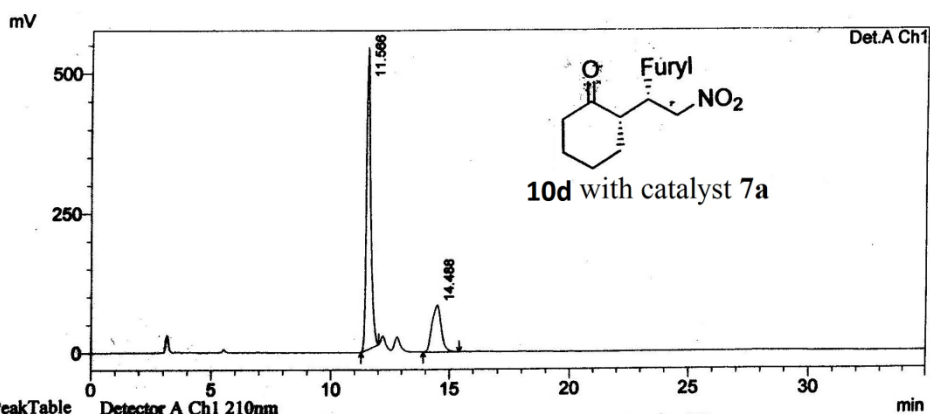

PeakTable

| Peak# | Ret. Time | Area    | Height | Area %  |
|-------|-----------|---------|--------|---------|
| 1     | 11.566    | 6755595 | 540755 | 75.463  |
| 2     | 14.488    | 2196565 | 83319  | 24.537  |
| Total |           | 8952160 | 624075 | 100.000 |

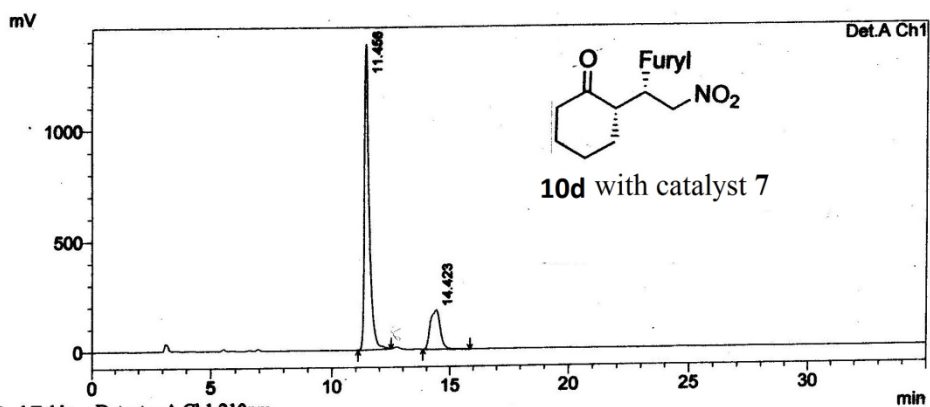

PeakTable

| Peak# | Ret. Time | Area     | Height  | Area %  |
|-------|-----------|----------|---------|---------|
| 1     | 11.456    | 19397675 | 1382960 | 79.088  |
| 2     | 14.423    | 5129006  | 177092  | 20.912  |
| Total |           | 24526681 | 1560052 | 100.000 |

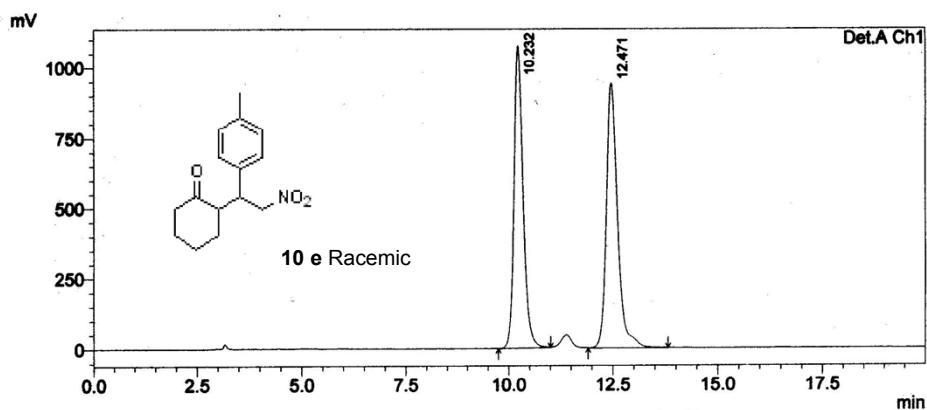

Detector A Ch1 210nm

| Peak#        | Ret. Time | Area            | Height         | Area %         |
|--------------|-----------|-----------------|----------------|----------------|
| 1            | 10.232    | 16270668        | 1074869        | 48.254         |
| 2            | 12.471    | 17448404        | 941704         | 51.746         |
| <b>Total</b> |           | <b>33719071</b> | <b>2016573</b> | <b>100.000</b> |

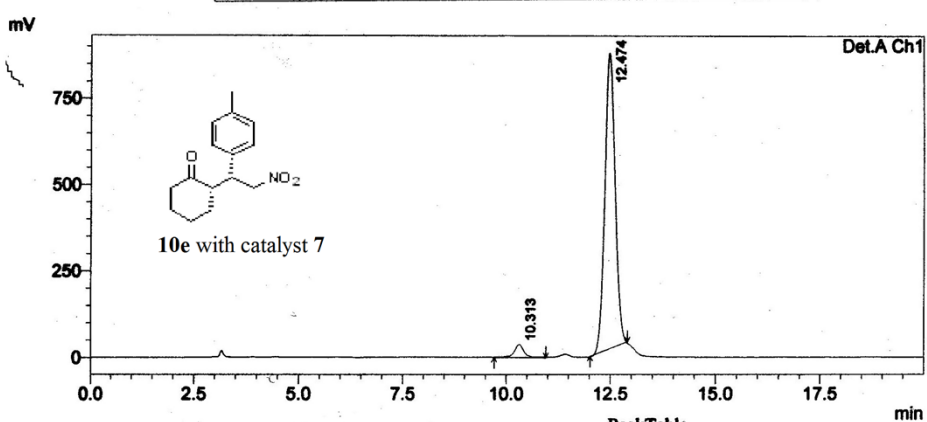

Detector A Ch1 210nm

| Peak#        | Ret. Time | Area            | Height        | Area %         |
|--------------|-----------|-----------------|---------------|----------------|
| 1            | 10.313    | 564201          | 37137         | 3.738          |
| 2            | 12.474    | 14527571        | 856493        | 96.262         |
| <b>Total</b> |           | <b>15091772</b> | <b>893631</b> | <b>100.000</b> |

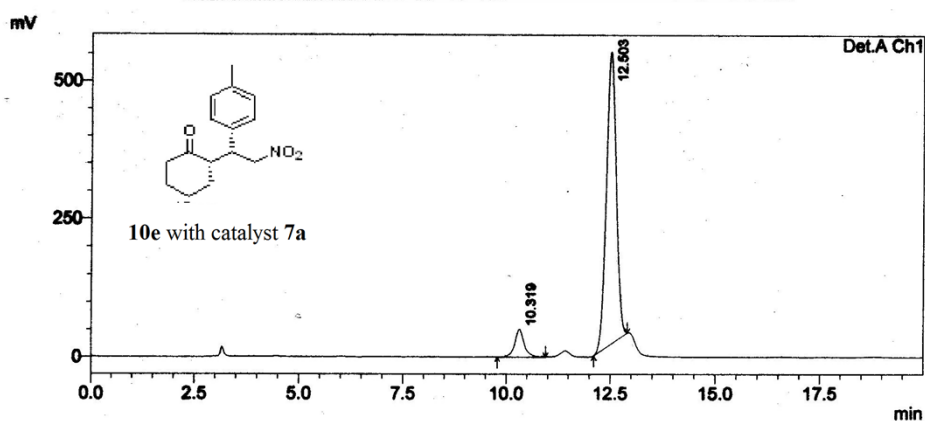

Detector A Ch1 210nm

| Peak#        | Ret. Time | Area           | Height        | Area %         |
|--------------|-----------|----------------|---------------|----------------|
| 1            | 10.319    | 795857         | 50577         | 8.374          |
| 2            | 12.503    | 8708218        | 531293        | 91.626         |
| <b>Total</b> |           | <b>9504076</b> | <b>581869</b> | <b>100.000</b> |

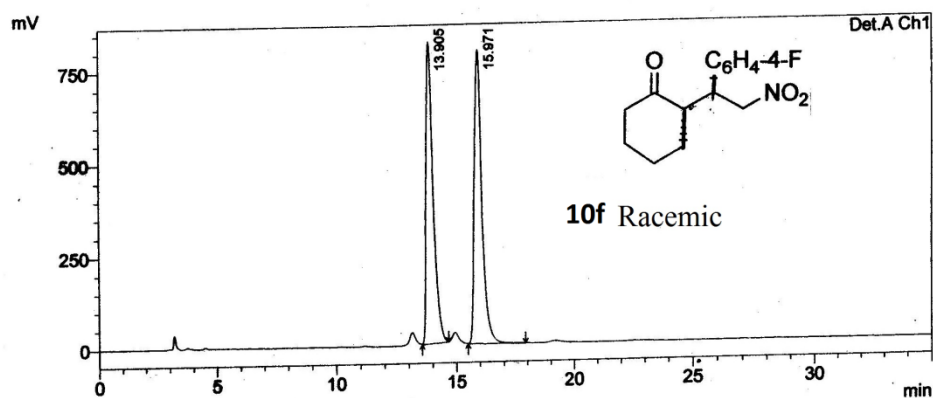

PeakTable Detector A Ch1 210nm

| Peak# | Ret. Time | Area     | Height  | Area %  |
|-------|-----------|----------|---------|---------|
| 1     | 13.905    | 16778050 | 818384  | 48.778  |
| 2     | 15.971    | 17618436 | 796714  | 51.222  |
| Total |           | 34396487 | 1615098 | 100.000 |

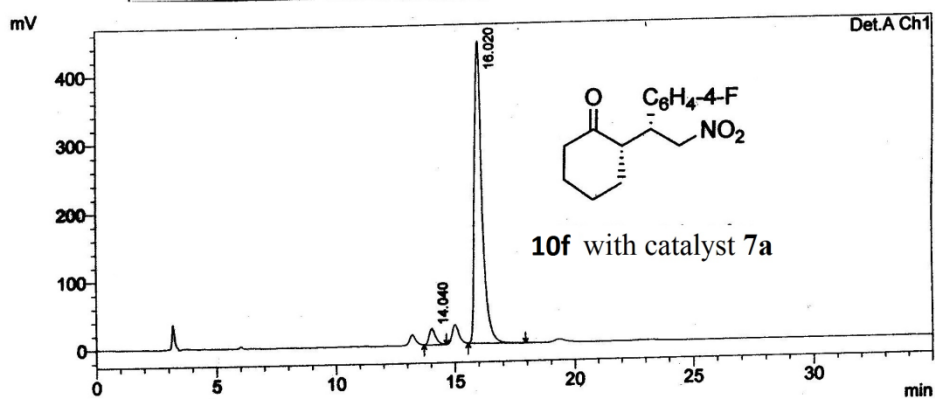

PeakTable Detector A Ch1 210nm

| Peak# | Ret. Time | Area    | Height | Area %  |
|-------|-----------|---------|--------|---------|
| 1     | 14.040    | 453330  | 23959  | 4.536   |
| 2     | 16.020    | 9540441 | 442974 | 95.464  |
| Total |           | 9993771 | 466933 | 100.000 |

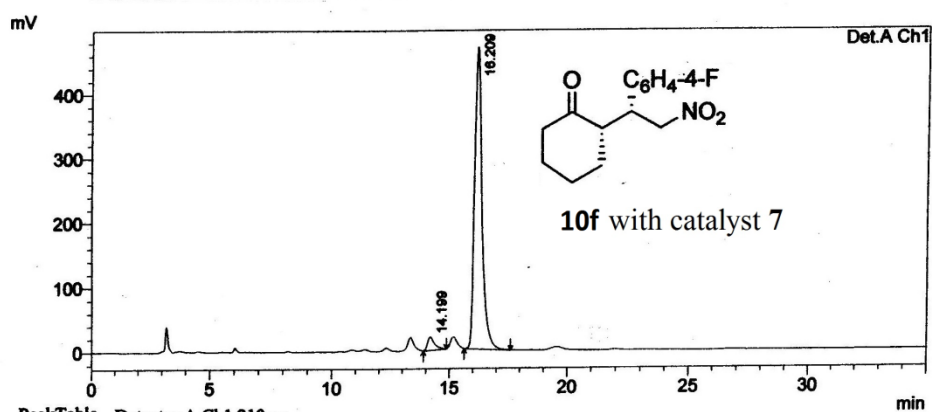

PeakTable Detector A Ch1 210nm

| Peak# | Ret. Time | Area     | Height | Area %  |
|-------|-----------|----------|--------|---------|
| 1     | 14.199    | 420905   | 20261  | 3.925   |
| 2     | 16.209    | 10302939 | 468975 | 96.075  |
| Total |           | 10723845 | 489236 | 100.000 |

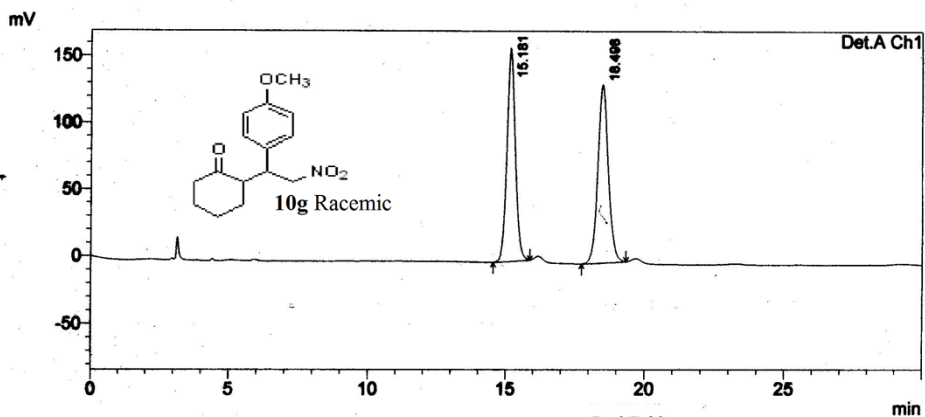

Detector A Ch1 210nm

| Peak# | Ret. Time | Area    | Height | Area %  |
|-------|-----------|---------|--------|---------|
| 1     | 15.181    | 3371893 | 159662 | 49.155  |
| 2     | 18.498    | 3487866 | 133602 | 50.845  |
| Total |           | 6859759 | 293264 | 100.000 |

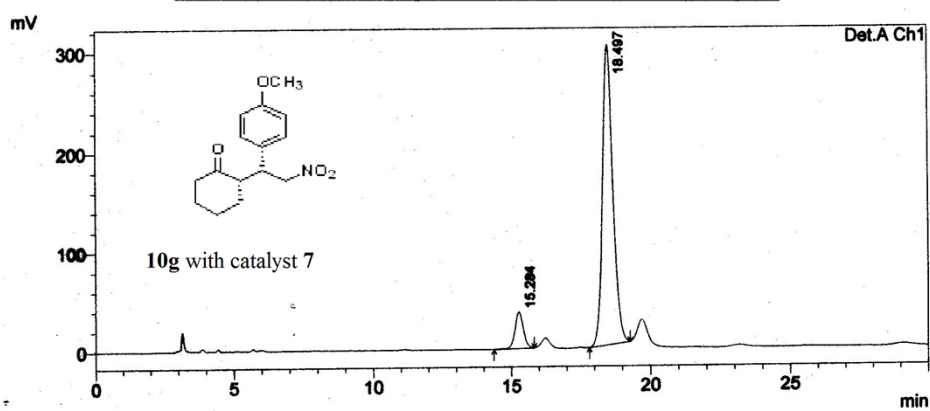

Detector A Ch1 210nm

| Peak# | Ret. Time | Area    | Height | Area %  |
|-------|-----------|---------|--------|---------|
| 1     | 15.284    | 771657  | 36812  | 9.000   |
| 2     | 18.497    | 7802209 | 302111 | 91.000  |
| Total |           | 8573866 | 338922 | 100.000 |

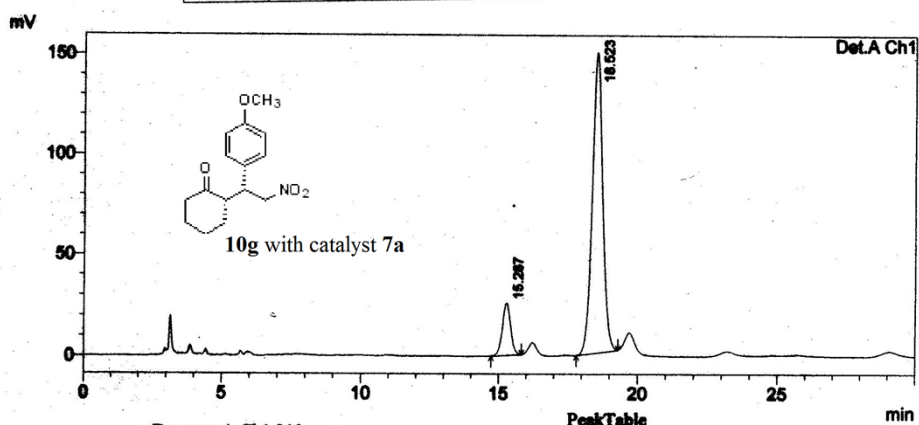

Detector A Ch1 210nm

| Peak# | Ret. Time | Area    | Height | Area %  |
|-------|-----------|---------|--------|---------|
| 1     | 15.287    | 536091  | 25774  | 12.210  |
| 2     | 18.523    | 3854523 | 149554 | 87.790  |
| Total |           | 4390614 | 175329 | 100.000 |



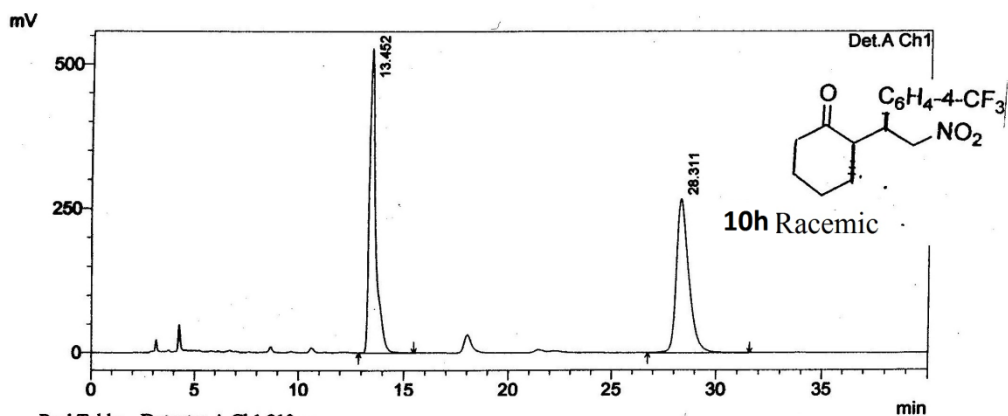

PeakTable Detector A Ch1 210nm

| Peak# | Ret. Time | Area     | Height | Area %  |
|-------|-----------|----------|--------|---------|
| 1     | 13.452    | 11127003 | 528082 | 50.418  |
| 2     | 28.311    | 10942339 | 266782 | 49.582  |
| Total |           | 22069342 | 794864 | 100.000 |

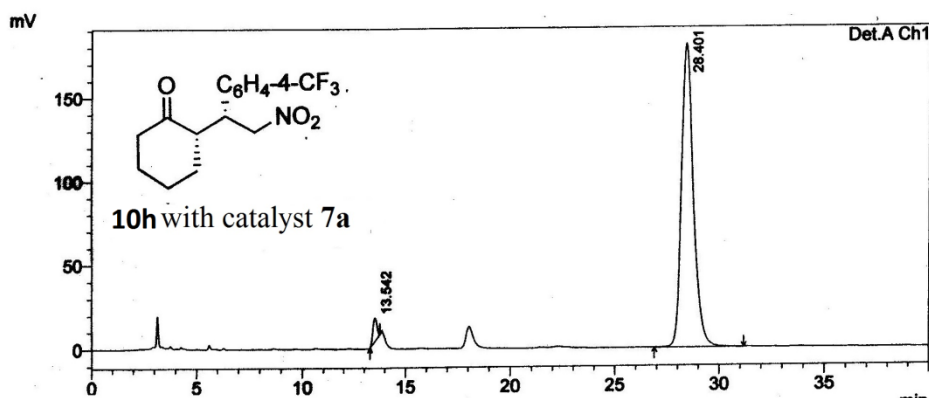

PeakTable Detector A Ch1 210nm

| Peak# | Ret. Time | Area    | Height | Area %  |
|-------|-----------|---------|--------|---------|
| 1     | 13.542    | 185383  | 13685  | 2.525   |
| 2     | 28.401    | 7157694 | 181350 | 97.475  |
| Total |           | 7343077 | 195034 | 100.000 |

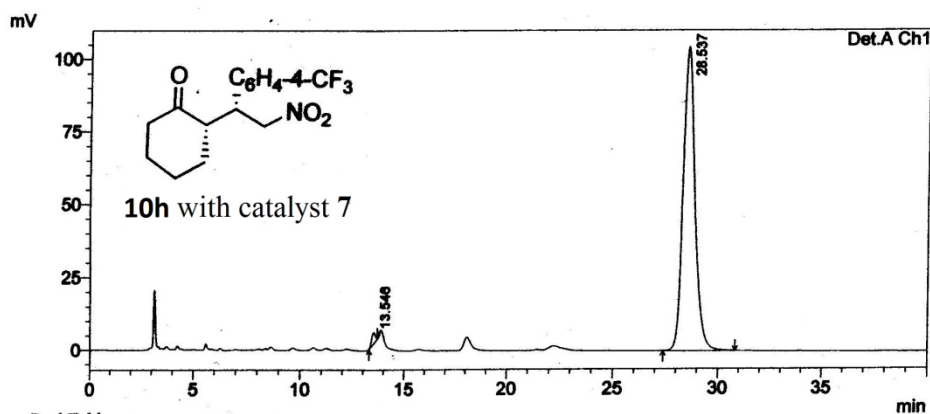

PeakTable Detector A Ch1 210nm

| Peak# | Ret. Time | Area    | Height | Area %  |
|-------|-----------|---------|--------|---------|
| 1     | 13.546    | 46212   | 3728   | 1.128   |
| 2     | 28.537    | 4050008 | 104735 | 98.872  |
| Total |           | 4096220 | 108463 | 100.000 |

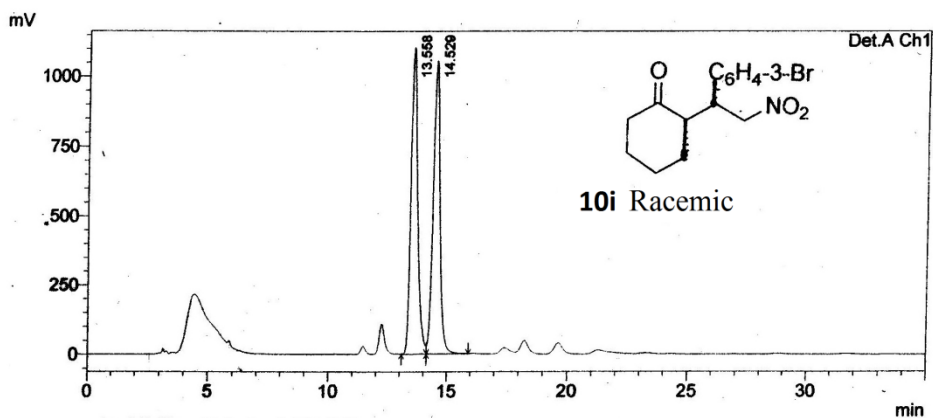

PeakTable Detector A Ch1 210nm

| Peak# | Ret. Time | Area     | Height  | Area %  |
|-------|-----------|----------|---------|---------|
| 1     | 13.558    | 21621886 | 1100718 | 50.465  |
| 2     | 14.529    | 21223677 | 1054513 | 49.535  |
| Total |           | 42845562 | 2155231 | 100.000 |

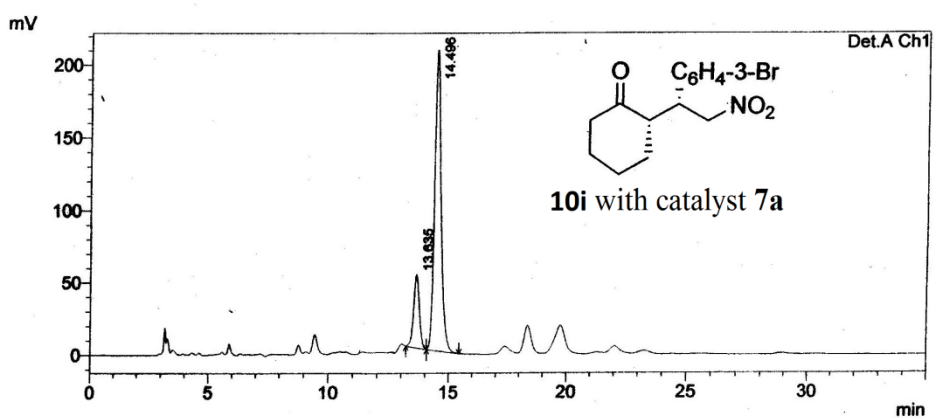

PeakTable Detector A Ch1 210nm

| Peak# | Ret. Time | Area    | Height | Area %  |
|-------|-----------|---------|--------|---------|
| 1     | 13.635    | 855872  | 50528  | 17.675  |
| 2     | 14.496    | 3986433 | 207360 | 82.325  |
| Total |           | 4842305 | 257887 | 100.000 |

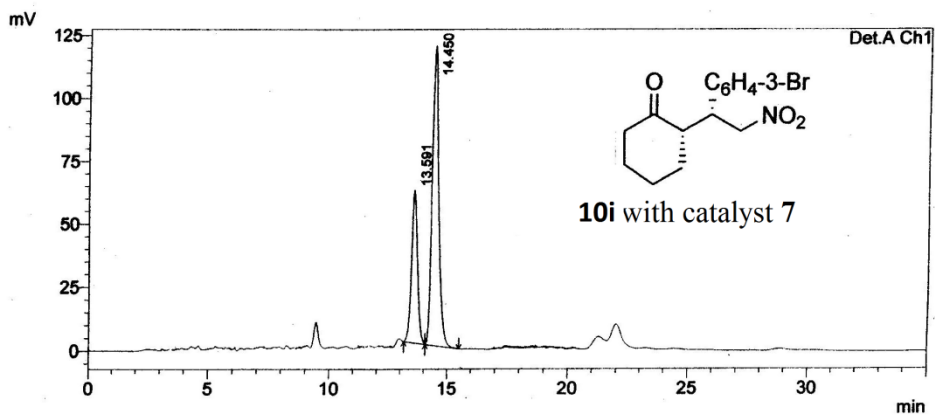

PeakTable Detector A Ch1 210nm

| Peak# | Ret. Time | Area    | Height | Area %  |
|-------|-----------|---------|--------|---------|
| 1     | 13.591    | 1071624 | 60419  | 32.037  |
| 2     | 14.450    | 2273297 | 118689 | 67.963  |
| Total |           | 3344921 | 179109 | 100.000 |

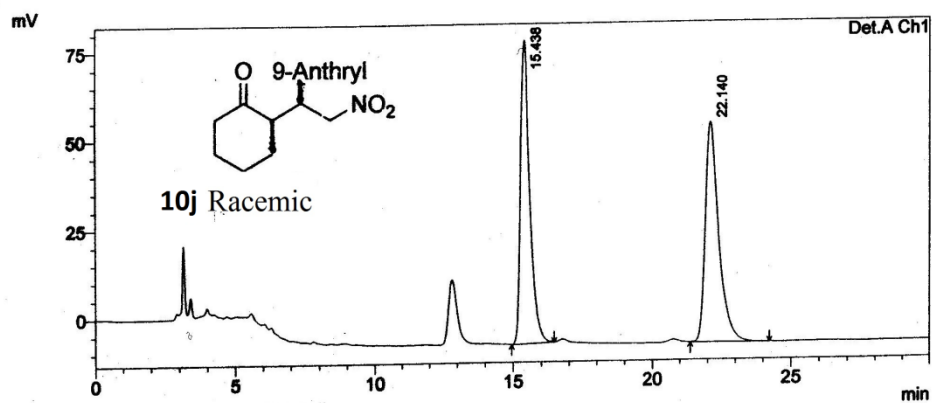

| Peak# | Ret. Time | Area    | Height | Area %  |
|-------|-----------|---------|--------|---------|
| 1     | 15.438    | 1938079 | 85556  | 48.192  |
| 2     | 22.140    | 2083515 | 61966  | 51.808  |
| Total |           | 4021594 | 147522 | 100.000 |

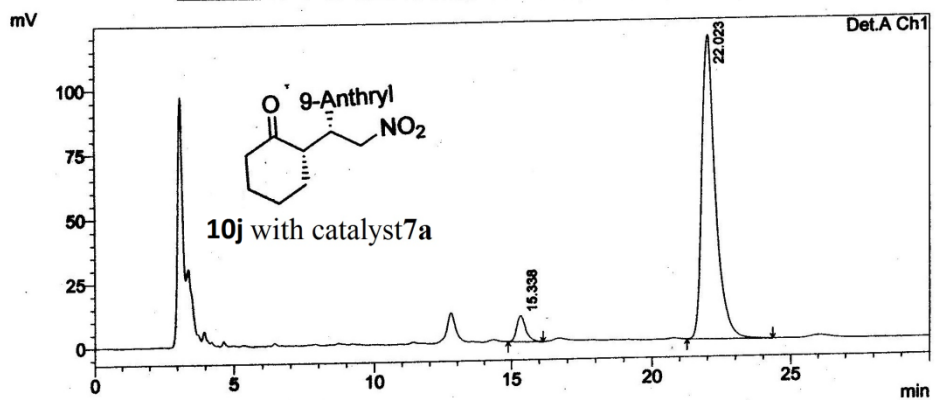

| Peak# | Ret. Time | Area    | Height | Area %  |
|-------|-----------|---------|--------|---------|
| 1     | 15.338    | 223389  | 9984   | 5.316   |
| 2     | 22.023    | 3978566 | 118166 | 94.684  |
| Total |           | 4201955 | 128150 | 100.000 |

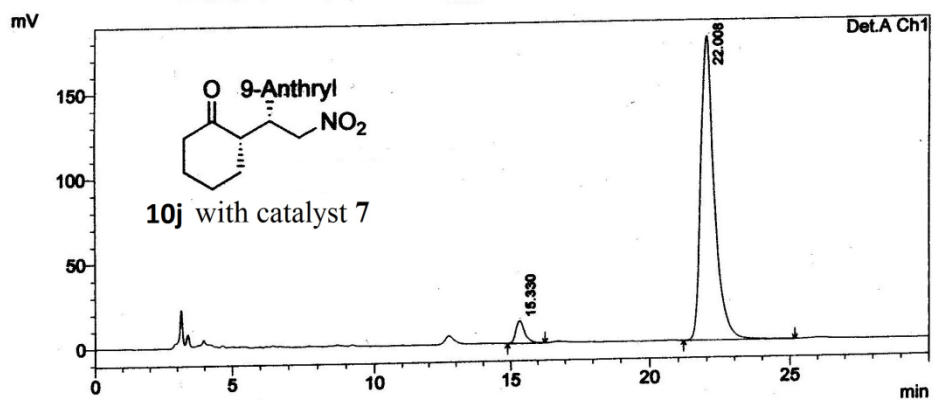

| Peak# | Ret. Time | Area    | Height | Area %  |
|-------|-----------|---------|--------|---------|
| 1     | 15.330    | 300335  | 13313  | 4.731   |
| 2     | 22.008    | 6048367 | 179696 | 95.269  |
| Total |           | 6348703 | 193008 | 100.000 |

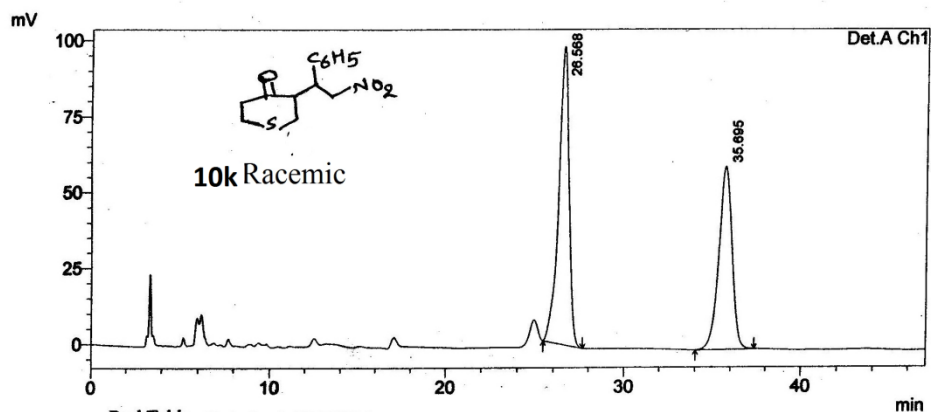

PeakTable Detector A Ch1 210nm

| Peak# | Ret. Time | Area    | Height | Area %  |
|-------|-----------|---------|--------|---------|
| 1     | 26.568    | 3980059 | 98281  | 56.109  |
| 2     | 35.695    | 3113357 | 60227  | 43.891  |
| Total |           | 7093416 | 158509 | 100.000 |

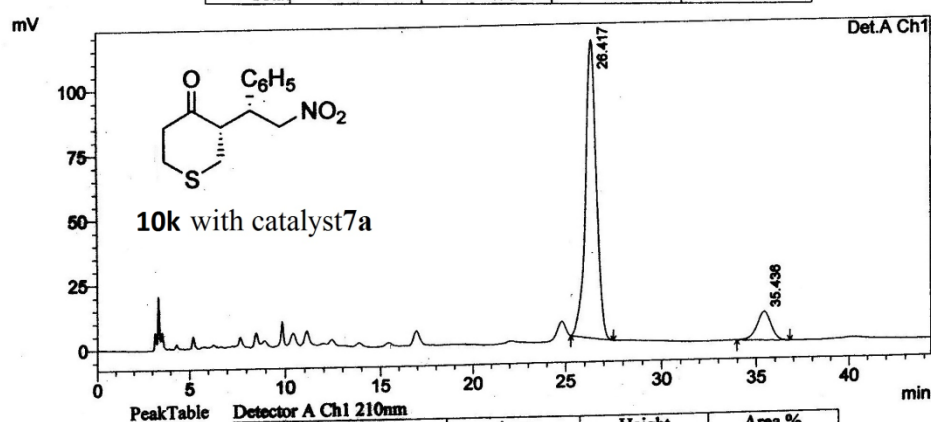

PeakTable Detector A Ch1 210nm

| Peak# | Ret. Time | Area    | Height | Area %  |
|-------|-----------|---------|--------|---------|
| 1     | 26.417    | 4529008 | 115257 | 88.704  |
| 2     | 35.436    | 576740  | 11108  | 11.296  |
| Total |           | 5105748 | 126365 | 100.000 |

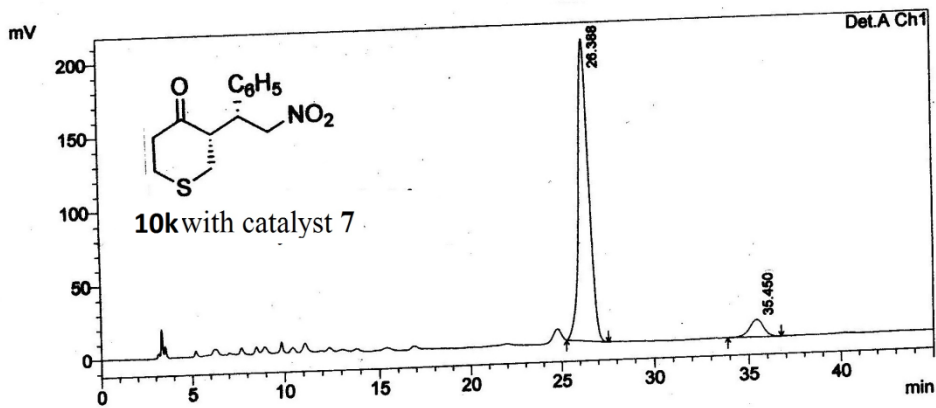

PeakTable Detector A Ch1 210nm

| Peak# | Ret. Time | Area    | Height | Area %  |
|-------|-----------|---------|--------|---------|
| 1     | 26.388    | 8013903 | 204581 | 93.038  |
| 2     | 35.450    | 599653  | 11630  | 6.962   |
| Total |           | 8613557 | 216211 | 100.000 |

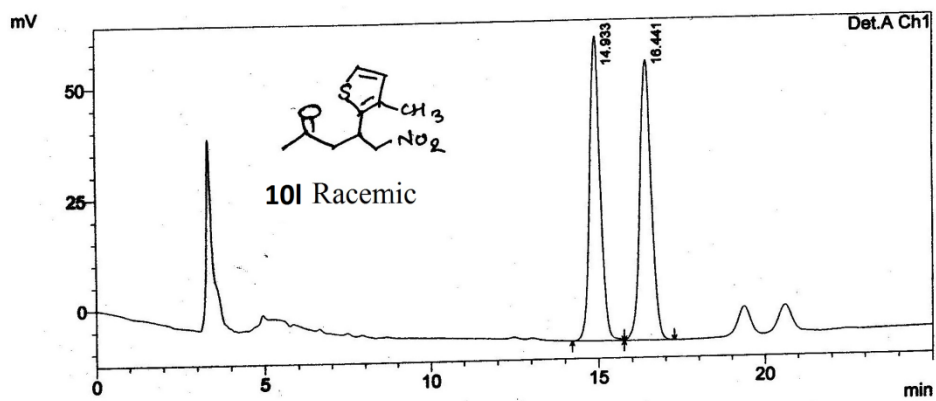

| Peak# | Ret. Time | Area    | Height | Area %  |
|-------|-----------|---------|--------|---------|
| 1     | 14.933    | 1493067 | 68812  | 50.036  |
| 2     | 16.441    | 1490902 | 63299  | 49.964  |
| Total |           | 2983969 | 132111 | 100.000 |

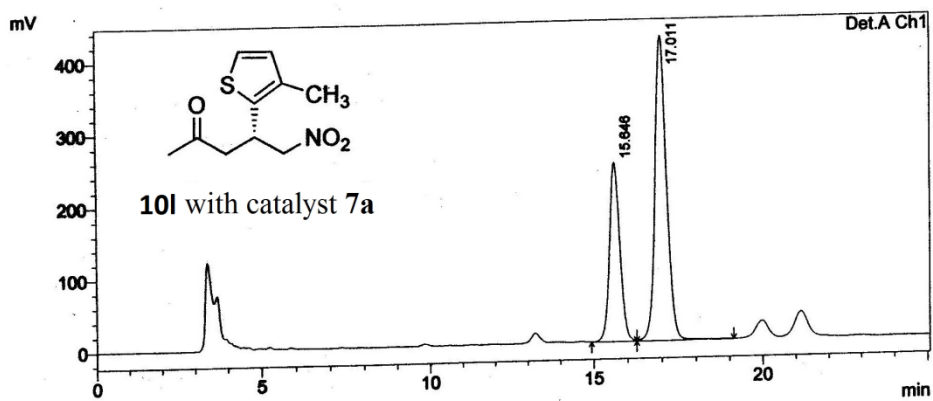

| Peak# | Ret. Time | Area     | Height | Area %  |
|-------|-----------|----------|--------|---------|
| 1     | 15.646    | 5235522  | 248129 | 34.687  |
| 2     | 17.011    | 9858026  | 422698 | 65.313  |
| Total |           | 15093549 | 670827 | 100.000 |

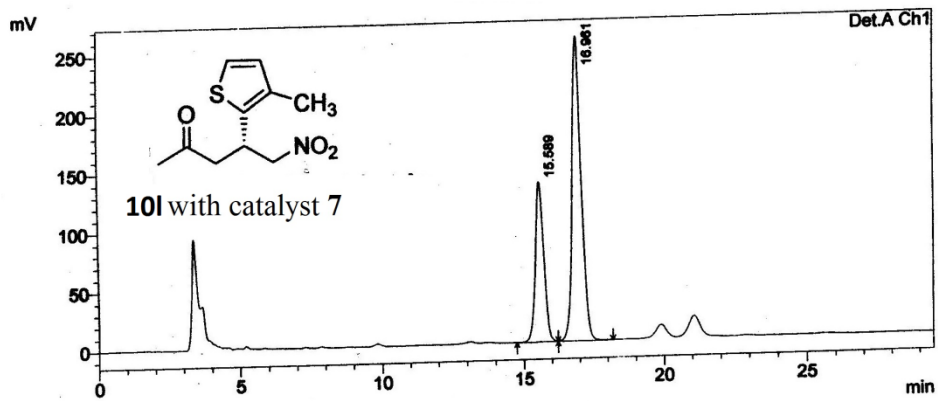

| Peak# | Ret. Time | Area    | Height | Area %  |
|-------|-----------|---------|--------|---------|
| 1     | 15.689    | 2841222 | 135960 | 32.396  |
| 2     | 16.961    | 5929130 | 258457 | 67.604  |
| Total |           | 8770352 | 394417 | 100.000 |

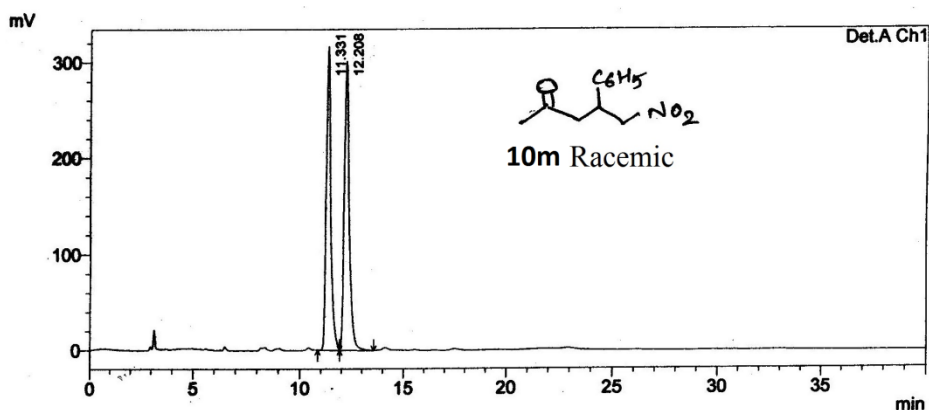

PeakTable Detector A Ch1 210nm

| Peak# | Ret. Time | Area    | Height | Area %  |
|-------|-----------|---------|--------|---------|
| 1     | 11.331    | 4885023 | 316642 | 49.004  |
| 2     | 12.208    | 5083613 | 301574 | 50.996  |
| Total |           | 9968636 | 618217 | 100.000 |

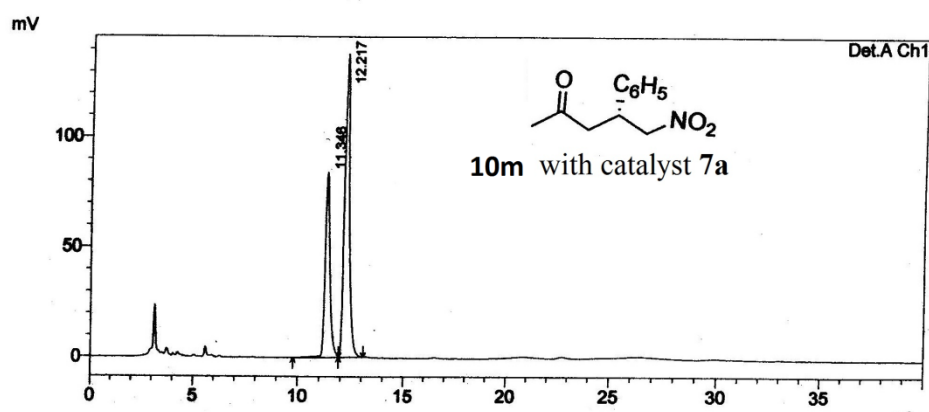

PeakTable Detector A Ch1 210nm

| Peak# | Ret. Time | Area    | Height | Area %  |
|-------|-----------|---------|--------|---------|
| 1     | 11.346    | 1313099 | 84166  | 36.581  |
| 2     | 12.217    | 2276462 | 138049 | 63.419  |
| Total |           | 3589561 | 222216 | 100.000 |

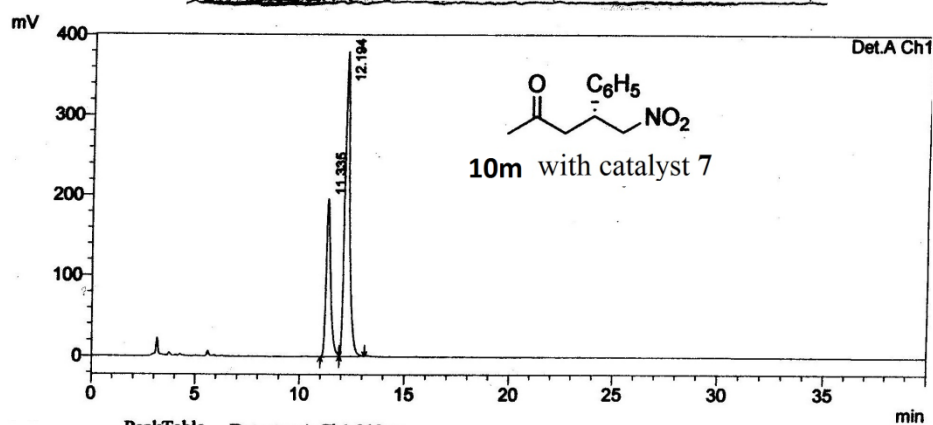

PeakTable Detector A Ch1 210nm

| Peak# | Ret. Time | Area    | Height | Area %  |
|-------|-----------|---------|--------|---------|
| 1     | 11.335    | 2982269 | 196275 | 32.071  |
| 2     | 12.194    | 6316756 | 379378 | 67.929  |
| Total |           | 9299025 | 575654 | 100.000 |



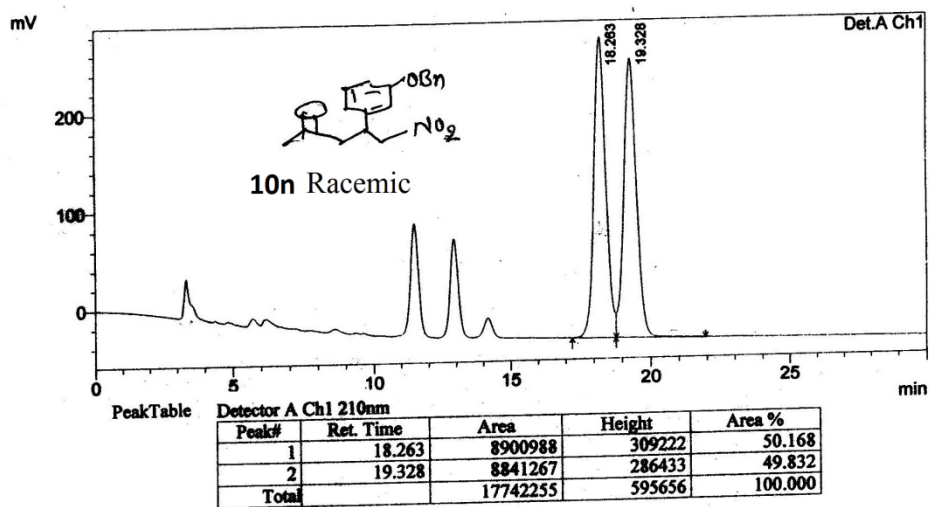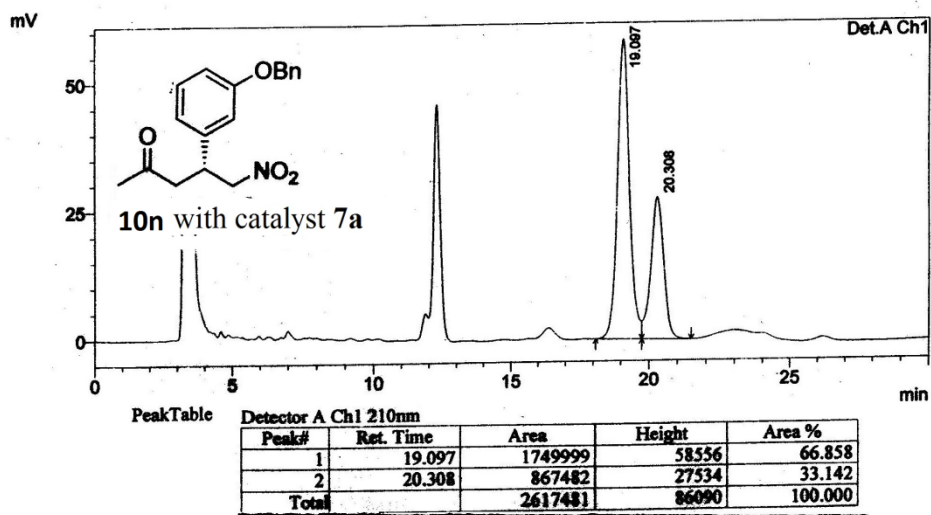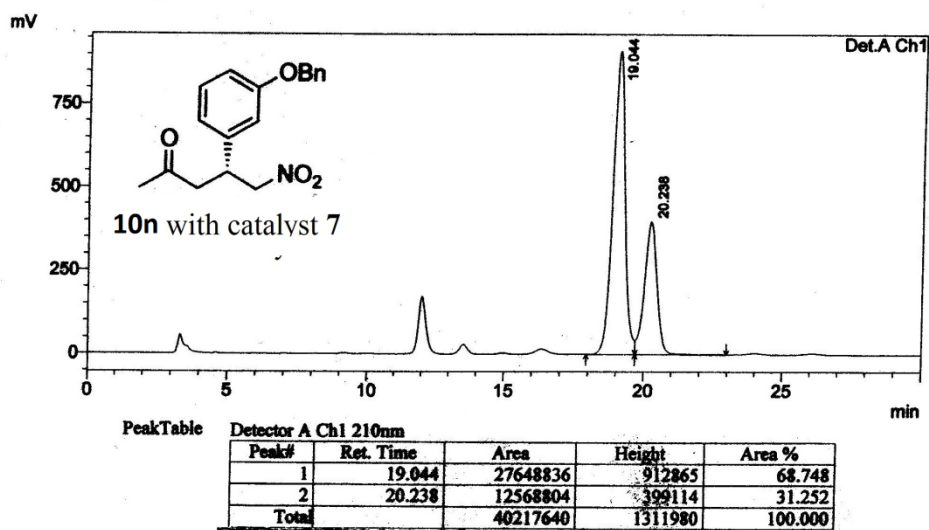

## 7. NMR-Experiments

TOCSY, HSQC and proton Spectrums of **7a** in 500  $\mu\text{l}$  of 90%  $\text{D}_2\text{O}$  and 10%  $\text{H}_2\text{O}$  (700MHz, 298K)

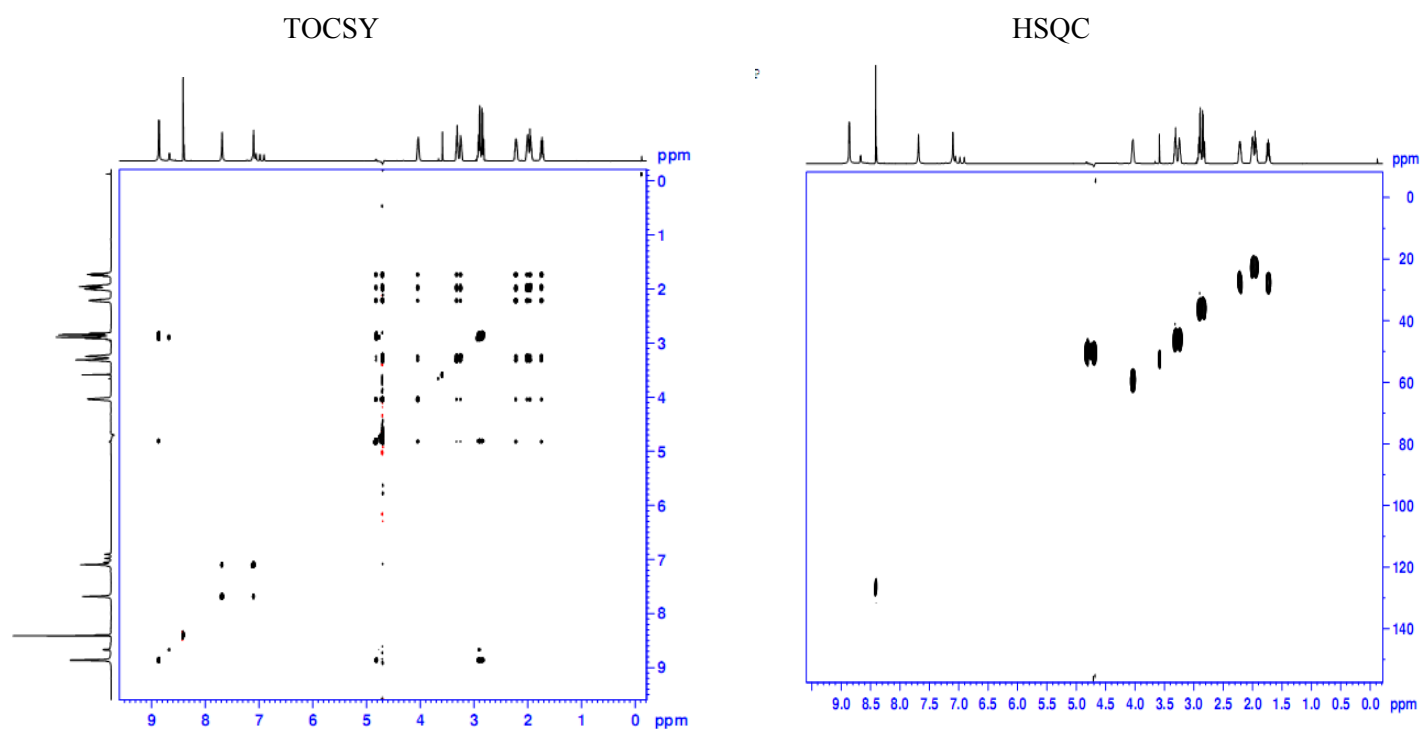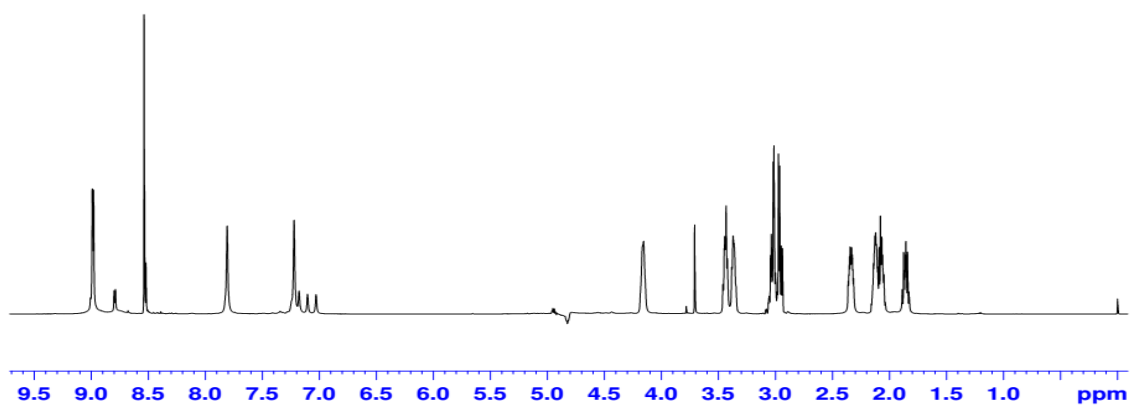

$^1\text{H}$  NMR Spectrum of **7a** 500  $\mu\text{l}$  of 90%  $\text{D}_2\text{O}$  and 10%  $\text{H}_2\text{O}$  (700MHz, 298K)

Figures 1a and 1b ROESY Spectrum of **7a** in 500  $\mu\text{l}$  of 90%  $\text{D}_2\text{O}$  and 10%  $\text{H}_2\text{O}$  (700MHz, 298K)



1a

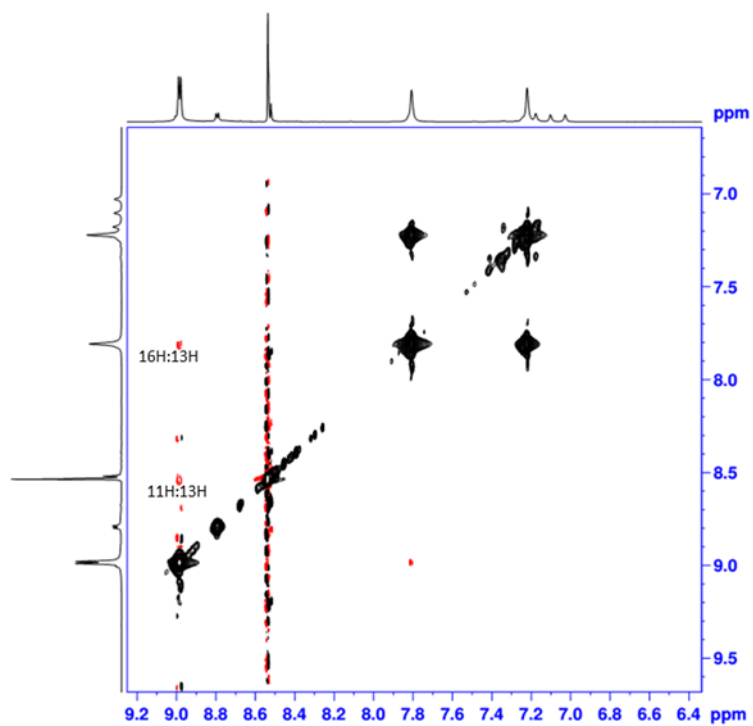

1b

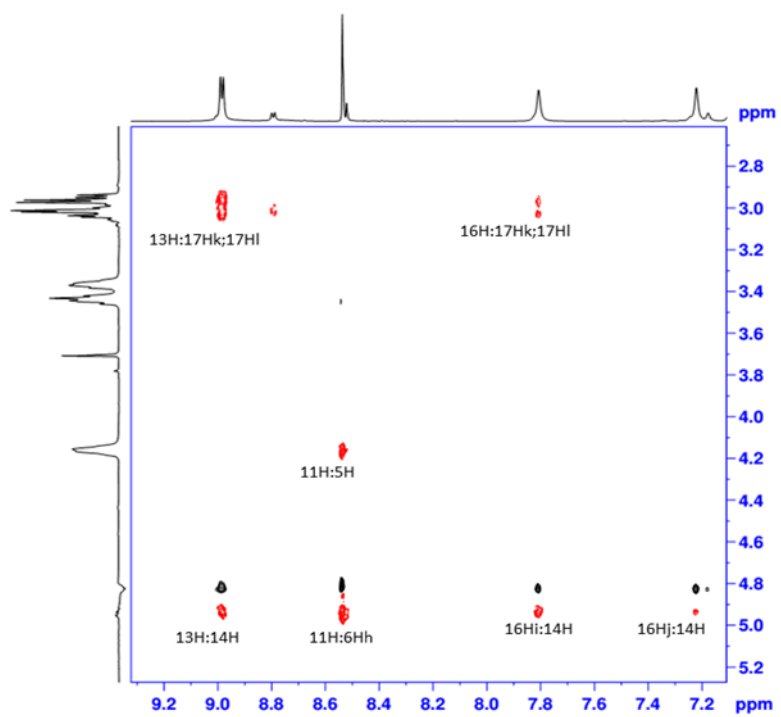

$^1\text{H}$  NMR Spectrum of **7** in 500  $\mu\text{l}$  of 90%  $\text{D}_2\text{O}$  and 10%  $\text{H}_2\text{O}$  (700 MHz, 298K)

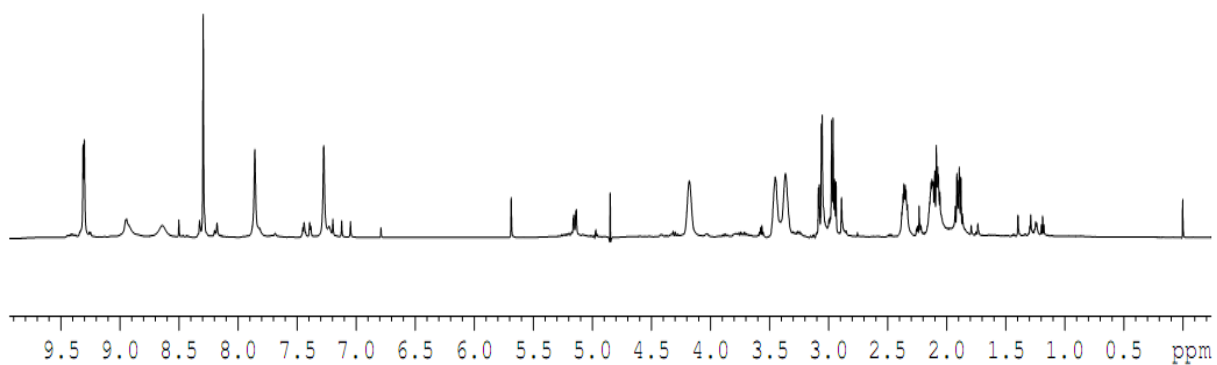

Figures 2a and 2b) ROESY Spectrum of 7 in 500  $\mu$ l of 90% D<sub>2</sub>O and 10% H<sub>2</sub>O (700MHz, 298K)

2a

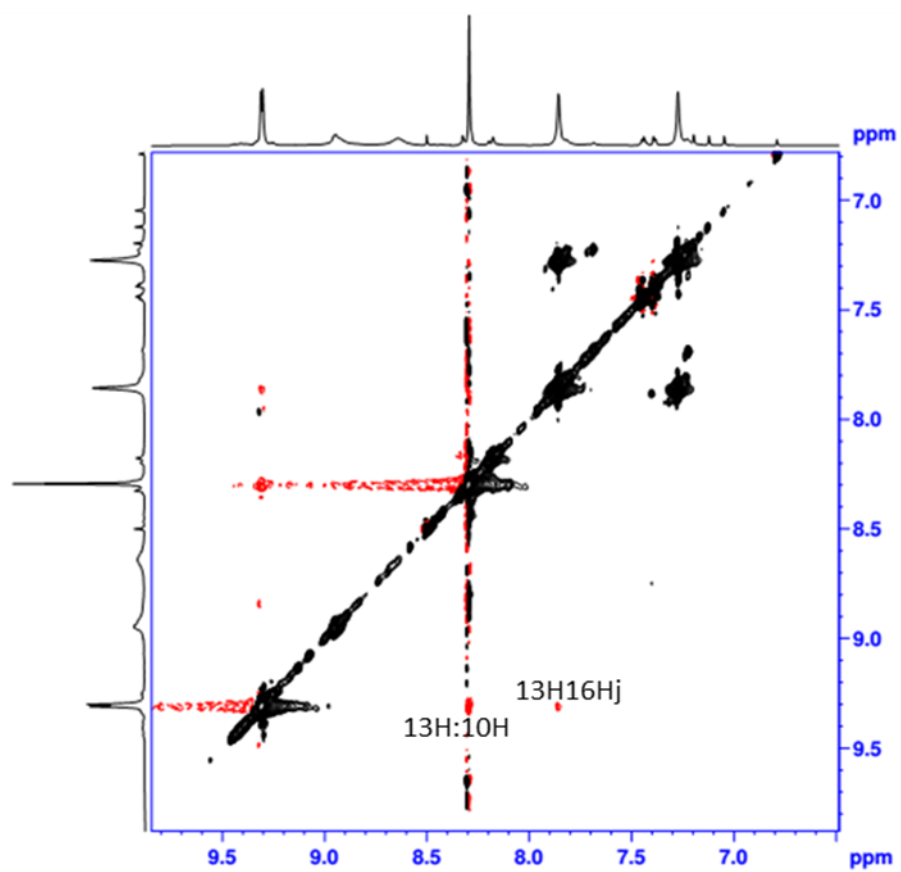

2b

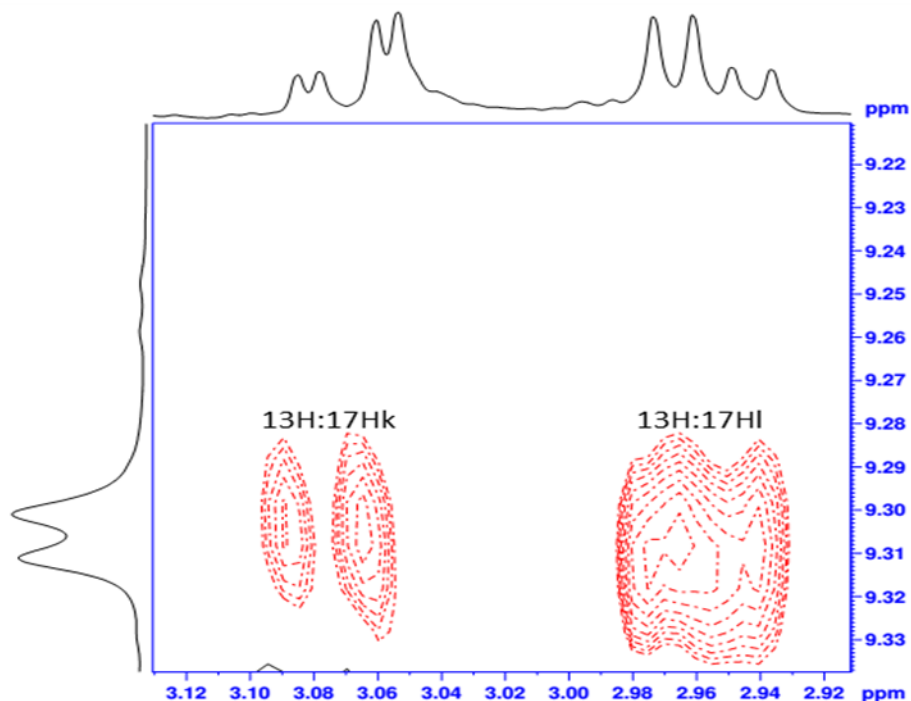

## 8. DFT Studies- Computational Methods of Transition States

Standard protocols for observing transition states are followed, by using Gaussian 09 software. Initially, the fully relaxed minimum energy structures of 1,5-triazole catalyst (**7**), 1,4-triazole catalyst (**7a**) and nitrostyrene obtained from simulated annealing are subjected to optimization at B3LYP/6-31\* level DFT calculations. The optimization was initially carried out in vacuum and then in MeOD solvent, by adopting PCM (Polarisable Continuum Model). These structures served as inputs (reactants) for computing transition state structures. The transition states for the addition of *anti* and *syn* enamine to the *si* and *re* faces of nitrostyrene were first located in the gas phase. These transition states are labelled *a-re*, *a-si*, *s-re*, and *s-si*. The noticeable charge separation in the transition state is expected upon addition of enamine to nitrostyrene. To obtain improved estimates of the reaction energetic continuum solvent effects are incorporated by computing the zero-point energies by using the PCM with methanol as the medium. Distances are in the angstrom units (Å).

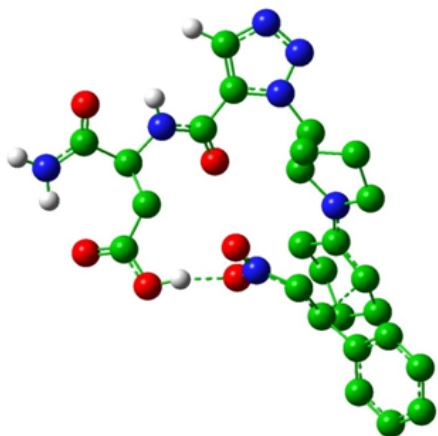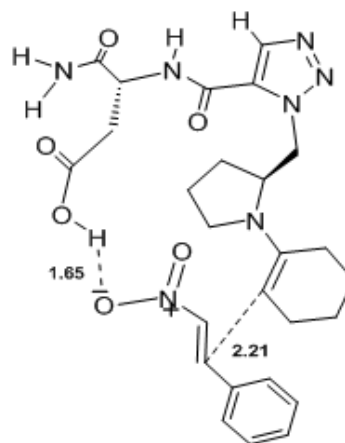

*7-anti* enamine + *re* nitrostyrene

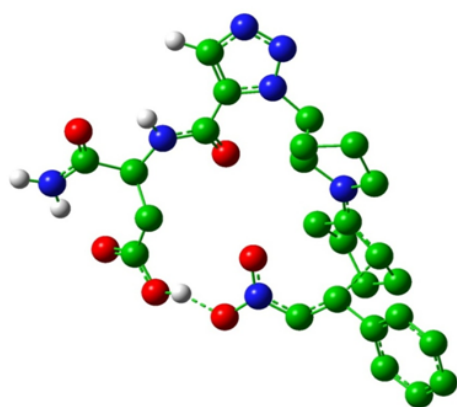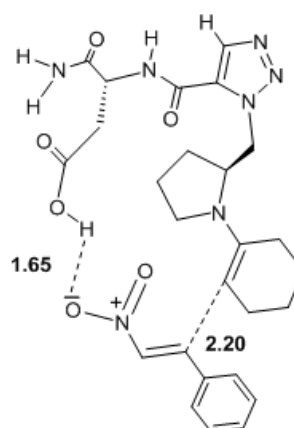

*7-anti* enamine + *si* nitrostyrene

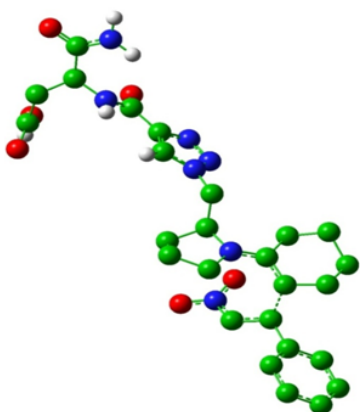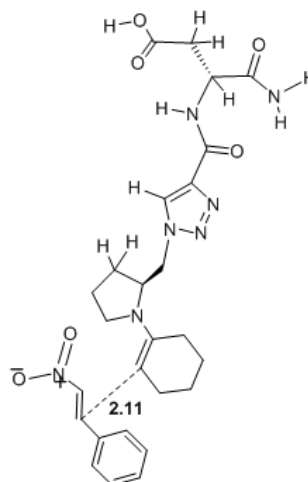

*7a-anti* enamine + *re* nitrostyrene

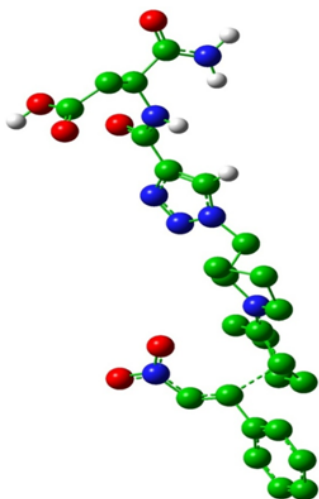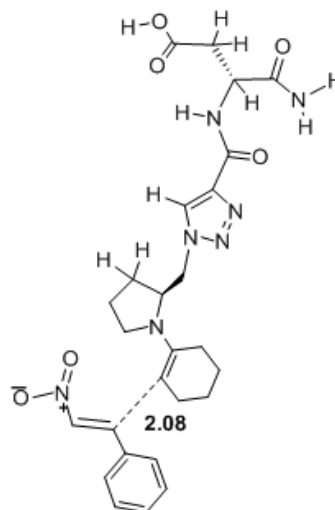

**7a-anti** enamine +*si* nitrostyrene

Quantum mechanical calculations of the transition states for the addition of *Anti* and *Syn* enamines to the *si* and *re* faces of nitrostyrene. Absolute Energies (HARTREE and Kcal/Mol) of all the Transition States calculated at **DFT B3LYP/6-31G\*** level of theory.

| ENAMINE+ NITRO STYRENE | TRANSITION STATE ENERGY (HARTREE) | TRANSITION STATE ENERGY (Kcal/Mol) |
|------------------------|-----------------------------------|------------------------------------|
| <i>anti-re</i>         | -1844.551983                      | 12.75                              |
| <i>anti-si</i>         | -1844.548347                      | 15.07                              |
| <i>syn-re</i>          | -1844.548473                      | 15.29                              |
| <i>syn-si</i>          | -1844.548767                      | 15.17                              |

| ENAMINE+ NITRO STYRENE | TRANSITION STATE ENERGY (HARTREE) | TRANSITION STATE ENERGY (Kcal/Mol) |
|------------------------|-----------------------------------|------------------------------------|
| <i>anti-re</i>         | -1844.567544                      | 2.43                               |
| <i>anti-si</i>         | -1844.565963                      | 3.42                               |
| <i>syn-re</i>          | -1844.562234                      | 5.83                               |
| <i>syn-si</i>          | -1844.562155                      | 5.88                               |

### Cartesian Coordinates of Transition State Structures

The B3LYP/6-31G (d) optimized geometries (Cartesian coordinates in (A<sup>0</sup>)), total electronic energies (in hartree/particle), of transition states of different stereochemical modes of addition of **7** enamine to nitrostyrene. The values in the parenthesis implies zero-point corrected energies evaluated at the PCM-B3LYP/6-31G (d) level of theory.

**7-anti enamine + re nitrostyrene**

Et = -1845.1601392 (-1844.567544)

|   |           |           |           |
|---|-----------|-----------|-----------|
| C | -0.658388 | 2.065377  | 0.899325  |
| C | 0.431445  | 3.146661  | 0.920702  |
| C | 1.608733  | 2.48284   | 0.196215  |
| N | 0.985216  | 1.441204  | -0.665242 |
| C | -0.486796 | 1.410955  | -0.481867 |
| C | -1.205937 | 2.186357  | -1.617355 |
| N | -2.641222 | 2.343604  | -1.371048 |
| N | -3.146068 | 3.588549  | -1.254060 |
| N | -4.430867 | 3.485851  | -1.016588 |
| C | -4.759612 | 2.170504  | -0.958889 |
| C | -3.623320 | 1.414094  | -1.185128 |
| C | -3.380048 | -0.053760 | -1.233746 |
| O | -2.510569 | -0.544664 | -1.964659 |
| N | -4.149905 | -0.775541 | -0.394907 |
| C | -4.003205 | -2.208006 | -0.199170 |
| C | -5.236773 | -2.638541 | 0.632511  |
| N | -5.408720 | -3.965257 | 0.753115  |
| C | -2.653064 | -2.517193 | 0.499783  |
| C | -2.134588 | -3.936043 | 0.322595  |
| O | -0.836420 | -4.110259 | 0.536434  |
| O | -2.838743 | -4.892795 | 0.022734  |
| O | -5.988491 | -1.790610 | 1.121662  |
| H | -1.663252 | 2.466154  | 1.051577  |
| H | -0.473501 | 1.309467  | 1.669585  |
| H | 0.102107  | 4.042058  | 0.383986  |
| H | 0.704214  | 3.450992  | 1.933983  |
| H | 2.290367  | 2.007480  | 0.903693  |
| H | 2.185941  | 3.175968  | -0.423482 |
| H | -0.815136 | 0.372487  | -0.489797 |
| H | -1.076110 | 1.686075  | -2.576525 |
| H | -0.818159 | 3.202652  | -1.701117 |
| H | -5.774373 | 1.841689  | -0.785453 |
| H | -4.839485 | -0.341261 | 0.213115  |
| H | -6.136484 | -4.303487 | 1.369099  |
| H | -4.665919 | -4.594942 | 0.450037  |
| H | -1.896472 | -1.837902 | 0.101846  |
| H | -2.715280 | -2.307574 | 1.575166  |
| H | -4.024181 | -2.715787 | -1.169128 |
| C | 1.702894  | 0.613028  | -1.441047 |
| C | 3.105866  | 0.542476  | -1.305457 |
| C | 3.958053  | -0.01776  | -2.429642 |
| C | 3.243721  | -1.061696 | -3.296604 |
| C | 1.836988  | -0.584291 | -3.663958 |

|   |           |           |           |
|---|-----------|-----------|-----------|
| C | 1.004035  | -0.337261 | -2.395823 |
| H | 3.585320  | 1.344136  | -0.754830 |
| H | 4.268585  | 0.825449  | -3.066184 |
| H | 4.887295  | -0.429102 | -2.018166 |
| H | 3.835249  | -1.255489 | -4.199009 |
| H | 3.171165  | -2.016595 | -2.758068 |
| H | 1.899114  | 0.339594  | -4.254930 |
| H | 1.322247  | -1.326178 | -4.284865 |
| H | 0.007283  | 0.017837  | -2.656595 |
| H | 0.860258  | -1.285217 | -1.867220 |
| H | -0.330356 | -3.242688 | 0.619818  |
| C | 5.127484  | 0.353361  | 1.520899  |
| C | 6.476680  | 0.480678  | 1.840928  |
| C | 7.409455  | -0.437936 | 1.347064  |
| C | 6.980578  | -1.483789 | 0.528744  |
| C | 5.628671  | -1.609964 | 0.204654  |
| C | 4.679086  | -0.697921 | 0.699335  |
| H | 4.420255  | 1.082345  | 1.906685  |
| H | 6.803001  | 1.300067  | 2.475177  |
| H | 8.461327  | -0.335408 | 1.598021  |
| H | 7.695642  | -2.204132 | 0.141618  |
| H | 5.299764  | -2.434985 | -0.421490 |
| C | 3.249684  | -0.900664 | 0.368656  |
| H | 3.044188  | -1.736540 | -0.291424 |
| C | 2.280141  | -0.688604 | 1.371942  |
| H | 2.448879  | -0.103438 | 2.264046  |
| N | 1.052357  | -1.276460 | 1.335208  |
| O | 0.244778  | -1.131613 | 2.290727  |
| O | 0.724783  | -2.002767 | 0.320349  |

**7-anti enamine + si nitrostyrene**

Et = -1845.1580996 (-1844.565963)

|   |           |           |           |
|---|-----------|-----------|-----------|
| C | -1.476346 | -2.742149 | -1.759722 |
| C | -0.962423 | -3.755722 | -2.791742 |
| C | -0.104213 | -2.894315 | -3.722326 |
| N | 0.369416  | -1.775552 | -2.867776 |
| C | -0.267564 | -1.819176 | -1.529250 |
| C | 0.712817  | -2.376492 | -0.465711 |
| N | 0.058593  | -2.557668 | 0.830662  |
| N | -0.128381 | -3.806448 | 1.301483  |
| N | -0.783924 | -3.720012 | 2.434040  |
| C | -1.041112 | -2.412619 | 2.689048  |
| C | -0.510548 | -1.643290 | 1.667831  |
| C | -0.451824 | -0.172679 | 1.449034  |
| O | 0.493307  | 0.360294  | 0.854225  |

|   |           |           |           |
|---|-----------|-----------|-----------|
| N | -1.504114 | 0.508142  | 1.945632  |
| C | -1.586923 | 1.956939  | 1.954205  |
| C | -2.702423 | 2.299899  | 2.972879  |
| N | -2.797177 | 3.598849  | 3.297951  |
| C | -1.862241 | 2.528768  | 0.537062  |
| C | -1.381338 | 3.962304  | 0.359622  |
| O | -1.255413 | 4.409418  | -0.880035 |
| O | -1.122216 | 4.705788  | 1.299660  |
| O | -3.426517 | 1.411991  | 3.432539  |
| H | -1.830072 | -3.208818 | -0.837614 |
| H | -2.298729 | -2.153041 | -2.178876 |
| H | -0.357301 | -4.531242 | -2.310622 |
| H | -1.768517 | -4.254300 | -3.335192 |
| H | -0.708007 | -2.499998 | -4.545474 |
| H | 0.750646  | -3.424807 | -4.151977 |
| H | -0.571735 | -0.807330 | -1.257668 |
| H | 1.567191  | -1.714818 | -0.330230 |
| H | 1.075390  | -3.365304 | -0.750101 |
| H | -1.557933 | -2.095966 | 3.583819  |
| H | -2.269682 | 0.043182  | 2.427097  |
| H | -3.551518 | 3.899987  | 3.900444  |
| H | -2.216663 | 4.283325  | 2.816590  |
| H | -1.367067 | 1.897718  | -0.206445 |
| H | -2.933855 | 2.492875  | 0.301828  |
| H | -0.636876 | 2.369443  | 2.309816  |
| C | 1.071627  | -0.737854 | -3.356371 |
| C | 1.303346  | -0.593663 | -4.742804 |
| C | 2.504913  | 0.190101  | -5.241753 |
| C | 2.975373  | 1.302456  | -4.296061 |
| C | 2.994022  | 0.812862  | -2.846683 |
| C | 1.588994  | 0.340562  | -2.432226 |
| H | 1.060784  | -1.447295 | -5.366765 |
| H | 3.326164  | -0.529383 | -5.385749 |
| H | 2.294915  | 0.594207  | -6.239386 |
| H | 3.969860  | 1.647458  | -4.602453 |
| H | 2.302959  | 2.166519  | -4.371294 |
| H | 3.713063  | -0.009351 | -2.731783 |
| H | 3.312180  | 1.613258  | -2.169082 |
| H | 1.572689  | 0.029012  | -1.388602 |
| H | 0.907873  | 1.196738  | -2.502490 |
| C | 0.177840  | 1.305350  | -7.598815 |
| C | 0.240925  | 1.120557  | -8.979941 |
| C | -0.283586 | -0.035661 | -9.562311 |
| C | -0.873141 | -1.009688 | -8.751606 |
| C | -0.931031 | -0.827964 | -7.371613 |



|   |           |           |            |
|---|-----------|-----------|------------|
| C | -0.411148 | 0.332604  | -6.769319  |
| H | 0.586915  | 2.214916  | -7.170420  |
| H | 0.699304  | 1.884375  | -9.601679  |
| H | -0.234755 | -0.176181 | -10.638311 |
| H | -1.289450 | -1.910271 | -9.194004  |
| H | -1.395978 | -1.589861 | -6.750446  |
| C | -0.529552 | 0.492723  | -5.301373  |
| H | -1.149708 | -0.248576 | -4.808741  |
| C | -0.631514 | 1.783566  | -4.745377  |
| H | -0.331512 | 2.691455  | -5.245025  |
| N | -1.212741 | 1.998052  | -3.529985  |
| O | -1.391941 | 3.218742  | -3.175574  |
| O | -1.582062 | 1.047773  | -2.783279  |
| H | -1.407283 | 3.731822  | -1.609703  |

The B3LYP/6-31G (d) optimized geometries (Cartesian coordinates in (A<sup>0</sup>)), total electronic energies (in hartree/particle), of transition states of different stereo chemical modes of addition of **7a** enamine to nitro styrene. The values in the parenthesis implies zero-point corrected energies evaluated at the PCM-B3LYP/6-31G (d) level of theory

**7a-anti enamine + re nitrostyrene**

Et = -1845.1434395 (-1844.551983)

|   |           |           |           |
|---|-----------|-----------|-----------|
| C | 3.035325  | -5.412734 | -2.973328 |
| C | 3.132865  | -5.403444 | -1.439778 |
| C | 1.744605  | -4.924013 | -0.985617 |
| C | 1.365582  | -3.880307 | -2.047152 |
| N | 1.927342  | -4.465005 | -3.284348 |
| C | 1.987470  | -2.488452 | -1.763073 |
| N | 1.261865  | -1.789778 | -0.704584 |
| C | 1.629250  | -1.532348 | 0.568114  |
| C | 0.547720  | -0.859033 | 1.112778  |
| N | -0.412444 | -0.749230 | 0.144327  |
| N | 0.017531  | -1.308103 | -0.948912 |
| C | 0.313114  | -0.292852 | 2.467135  |
| O | -0.774595 | 0.178990  | 2.789515  |
| N | 1.392410  | -0.318001 | 3.314307  |
| C | 1.300182  | 0.094118  | 4.706582  |
| C | 2.066534  | 1.396565  | 5.034273  |
| N | 2.492653  | 2.118064  | 3.977387  |
| H | 2.252838  | -0.754788 | 3.008799  |
| H | 2.959686  | 3.000047  | 4.138267  |
| H | 2.334307  | 1.816184  | 3.027478  |
| O | 2.232470  | 1.736185  | 6.205226  |
| C | 1.752421  | -1.020084 | 5.667296  |

|   |           |           |           |
|---|-----------|-----------|-----------|
| C | 0.883241  | -2.257404 | 5.627258  |
| O | -0.428089 | -1.962665 | 5.758982  |
| O | 1.293794  | -3.394357 | 5.515796  |
| H | 2.785911  | -6.404748 | -3.349133 |
| H | 3.953707  | -5.076758 | -3.465690 |
| H | 3.915495  | -4.713162 | -1.108397 |
| H | 3.382458  | -6.392630 | -1.048634 |
| H | 1.019527  | -5.743151 | -1.022667 |
| H | 1.740716  | -4.508850 | 0.026266  |
| H | 0.283216  | -3.786829 | -2.158013 |
| H | 3.02767   | -2.577636 | -1.444938 |
| H | 1.965025  | -1.852682 | -2.649257 |
| H | 2.588737  | -1.837030 | 0.957823  |
| H | 0.243329  | 0.315338  | 4.880751  |
| H | 1.729753  | -0.607555 | 6.681288  |
| H | 2.779695  | -1.329133 | 5.455739  |
| H | -0.919901 | -2.806281 | 5.734610  |
| C | 1.485225  | -4.214038 | -4.524510 |
| C | 1.893419  | -5.021242 | -5.615604 |
| C | 1.852645  | -4.440319 | -7.023048 |
| C | 0.710896  | -3.443812 | -7.252421 |
| C | 0.649476  | -2.425139 | -6.112285 |
| C | 0.446749  | -3.133520 | -4.762742 |
| H | 2.759767  | -5.651915 | -5.442358 |
| H | 2.811787  | -3.931199 | -7.203682 |
| H | 1.805752  | -5.252421 | -7.756255 |
| H | 0.852821  | -2.937699 | -8.214522 |
| H | -0.24919  | -3.974232 | -7.315716 |
| H | 1.577587  | -1.838035 | -6.087126 |
| H | -0.171861 | -1.715719 | -6.264601 |
| H | 0.434283  | -2.402493 | -3.953346 |
| H | -0.534088 | -3.622997 | -4.748296 |
| C | 2.080464  | -8.301695 | -6.432576 |
| C | 2.499023  | -9.146805 | -7.458514 |
| C | 1.819054  | -9.162960 | -8.680599 |
| C | 0.719685  | -8.323551 | -8.867879 |
| C | 0.302804  | -7.474491 | -7.840775 |
| C | 0.970719  | -7.455448 | -6.604843 |
| H | 2.625133  | -8.294343 | -5.492313 |
| H | 3.359528  | -9.792308 | -7.305560 |
| H | 2.147234  | -9.821698 | -9.479677 |
| H | 0.184228  | -8.326736 | -9.813286 |
| H | -0.558118 | -6.828474 | -7.992604 |
| C | 0.469354  | -6.573611 | -5.515032 |
| H | -0.363112 | -5.935497 | -5.797350 |

|   |           |           |           |
|---|-----------|-----------|-----------|
| C | 0.357458  | -7.139765 | -4.224349 |
| H | 0.884242  | -8.029553 | -3.911692 |
| N | -0.459753 | -6.614617 | -3.261088 |
| O | -0.554454 | -7.214940 | -2.146711 |
| O | -1.126325 | -5.555705 | -3.482409 |

**7a-anti enamine + si nitrostyrene**

Et = -1845.1395547 (-1844.548347)

|   |           |           |           |
|---|-----------|-----------|-----------|
| C | 3.439905  | -4.545805 | -3.121808 |
| C | 3.621987  | -4.359378 | -1.611820 |
| C | 2.214998  | -3.965248 | -1.138102 |
| C | 1.703080  | -3.051430 | -2.262346 |
| N | 2.320585  | -3.636556 | -3.473366 |
| C | 2.149839  | -1.578100 | -2.085084 |
| N | 1.327497  | -0.888483 | -1.093456 |
| C | 1.636401  | -0.490972 | 0.158759  |
| C | 0.475369  | 0.098386  | 0.631750  |
| N | -0.468269 | 0.028199  | -0.356183 |
| N | 0.043517  | -0.570452 | -1.392185 |
| C | 0.167118  | 0.761302  | 1.926407  |
| O | -0.804155 | 1.501165  | 2.059624  |
| N | 1.056049  | 0.504461  | 2.941915  |
| C | 0.863608  | 1.018896  | 4.290150  |
| C | 1.919726  | 2.060444  | 4.727274  |
| N | 2.723018  | 2.537230  | 3.754862  |
| H | 1.737229  | -0.234019 | 2.815833  |
| H | 3.402560  | 3.250554  | 3.981150  |
| H | 2.652434  | 2.213357  | 2.801630  |
| O | 1.971565  | 2.428953  | 5.900133  |
| C | 0.800102  | -0.110963 | 5.334091  |
| C | -0.375854 | -1.044558 | 5.151297  |
| O | -1.548354 | -0.376974 | 5.095971  |
| O | -0.302823 | -2.254176 | 5.080120  |
| H | 3.161777  | -5.578556 | -3.354082 |
| H | 4.329545  | -4.290448 | -3.704837 |
| H | 4.343388  | -3.561173 | -1.406671 |
| H | 3.991145  | -5.269983 | -1.134299 |
| H | 1.570627  | -4.848062 | -1.076423 |
| H | 2.206439  | -3.471875 | -0.162243 |
| H | 0.616250  | -3.100037 | -2.356546 |
| H | 3.187872  | -1.518109 | -1.753159 |
| H | 2.065614  | -1.025151 | -3.021833 |
| H | 2.621599  | -0.628225 | 0.577615  |
| H | -0.093265 | 1.548456  | 4.272584  |

|   |           |           |           |
|---|-----------|-----------|-----------|
| H | 0.729283  | 0.357887  | 6.320716  |
| H | 1.711595  | -0.714640 | 5.314026  |
| H | -2.256472 | -1.040254 | 4.982798  |
| C | 1.792637  | -3.562302 | -4.703505 |
| C | 2.226875  | -4.408606 | -5.759651 |
| C | 2.151406  | -3.886530 | -7.191430 |
| C | 0.966133  | -2.952409 | -7.465171 |
| C | 0.821730  | -1.914671 | -6.350735 |
| C | 0.650547  | -2.621342 | -4.993016 |
| H | 3.144154  | -4.959062 | -5.569436 |
| H | 3.087317  | -3.342614 | -7.391612 |
| H | 2.143843  | -4.729461 | -7.891057 |
| H | 1.103314  | -2.460864 | -8.435595 |
| H | 0.037884  | -3.533931 | -7.532202 |
| H | 1.703557  | -1.260806 | -6.321176 |
| H | -0.048149 | -1.271744 | -6.526259 |
| H | 0.494775  | -1.894349 | -4.196022 |
| H | -0.261500 | -3.233239 | -5.045286 |
| C | 1.019418  | -7.080583 | -7.872602 |
| C | 1.583116  | -7.962905 | -8.794814 |
| C | 2.689255  | -8.740349 | -8.443067 |
| C | 3.229580  | -8.627067 | -7.159588 |
| C | 2.667334  | -7.742518 | -6.240111 |
| C | 1.550286  | -6.957714 | -6.575993 |
| H | 0.157687  | -6.489341 | -8.166830 |
| H | 1.154589  | -8.043459 | -9.790007 |
| H | 3.125288  | -9.428262 | -9.161991 |
| H | 4.087124  | -9.229361 | -6.872517 |
| H | 3.092207  | -7.665010 | -5.241941 |
| C | 0.966225  | -6.057910 | -5.543016 |
| H | 1.328681  | -6.256821 | -4.539550 |
| C | -0.422573 | -5.783615 | -5.571501 |
| H | -1.054736 | -5.871978 | -6.441787 |
| N | -1.096924 | -5.442295 | -4.426931 |
| O | -2.356086 | -5.320563 | -4.467516 |
| O | -0.460242 | -5.255218 | -3.340881 |
